# Supplementary material for: Association Mapping Analysis of Fatty Acid Content in Different Ecotypic Rapeseed Using mrMLM
Source: Front Plant Sci. 2019 Jan 4;9:1872. doi: 10.3389/fpls.2018.01872 (PMC6328494; doi:10.3389/fpls.2018.01872)
Supplement: Supplementary Table S2 — Sum of SNPs in candidate regions for fatty acid content in B. napus accessions grown in different environments. [file Table_2.XLSX]

## Sheet: Sheet1
Supplementary Table S2 Sum of SNPs in candidate regions for fatty acid content in B. napus accessions grown in different environments.
Fatty acid	Chr	SNP associated	Position (bp)	SNP effect	-LOG10(P)	alleles	Environment
C16:0	A01	Bn-A01-p637586	228343	0.90	5.42	A/G	17Sp
	A01	Bn-A01-p4167795	3847687	0.86	11.74	T/G	18Sp
	A01	Bn-A01-p20987149	17792508	1.19	7.76	A/G	17Sp
	A01	Bn-A01-p22085117	18711173	1.20	8.54	T/G	17Sp
	A01	Bn-A01-p23253678	19111083	-0.46	5.31	A/C	18Sp
	A01	Bn-A01-p24696367	20464354	-0.98	6.28	T/G	16Sp
	A02	Bn-Scaffold013964-p106	5968720	0.54	5	A/G	18Sp
	A02	Bn-A02-p9464293	6271471	0.97	15.26	T/C	18Sp
	A02	Bn-A02-p10591779	7458917	0.52	5.82	T/C	18Sp
	A03	Bn-scaff_15762_1-p670319	7355650	-0.96	6.12	T/C	16Win
	A03	Bn-A03-p20145024	19008703	1.26	9.93	T/G	17Sp
	A03	Bn-A03-p20369417	19241578	1.27	7.39	A/G	17Semi
	A03	Bn-A03-p20417630	19283838	1.27	7.39	A/G	17Semi
	A03	Bn-scaff_23813_1-p167977	21191617	-1.19	7.78	A/C	17Sp
	A03	Bn-A03-p28560659	27022904	-0.67	5.13	T/C	16Win
	A03	Bn-A03-p30852922	28640931	1.19	7.76	T/C	17Sp
	A04	Bn-Scaffold000993-p187	1061210	-0.91	5.72	T/G	16Sp
	A04	Bn-A06-p5190285	4042405	1.19	7.76	T/C	17Sp
	A04	Bn-A04-p12205378	13193340	-0.53	5.96	A/G	16Sp
	A04	Bn-A04-p14092385	14628644	-0.78	5.11	T/G	16Sp
	A04	Bn-A04-p14687930	15158346	0.59-0.82	5.23-6.72	T/A	17Sp,18Sp
	A06	Bn-A06-p1312619	1350491	0.4	5.48	T/G	18Sp
	A06	Bn-A06-p8546149	8063822	0.53	5.56	T/C	17Sp
	A06	Bn-A06-p8842980	8331823	-1.19	7.78	A/G	17Sp
	A06	Bn-A06-p15515345	17020135	-0.53	5.19	A/C	18Sp
	A06	Bn-A06-p16071214	17559622	-0.92- -0.88	5.50-5.68	A/C	16Sp,17Sp
	A07	Bn-A09-p18352122	1487626	-0.91	5.49	A/C	17Sp
	A07	Bn-A07-p6641473	8574483	-0.91	5.49	A/G	17Sp
	A07	Bn-A07-p6723305	8655641	-0.91	5.49	A/G	17Sp
	A07	Bn-A07-p6757359	8687235	-0.91	5.49	A/G	17Sp
	A07	Bn-A07-p6759128	8688994	-0.91	5.49	A/G	17Sp
	A07	Bn-A07-p9512042	10867491	0.62	7.26	A/G	18Sp
	A07	Bn-A07-p10430301	11624458	-1.19	7.78	T/C	17Sp
	A07	Bn-A02-p6233	12615849	0.93	5.37	T/G	17Sp
	A07	Bn-A02-p1198	12619482	-0.88- -0.59	5.36-6.57	A/G	17Sp,18Sp
	A07	Bn-A07-p13613886	15608800	-0.52	5.86	T/C	18Sp
	A08	Bn-A08-p1088499	999828	0.82	5.05	C/G	16Sp
	A08	Bn-A08-p6282126	5334539	0.48	5.44	A/G	18Sp
	A08	Bn-scaff_16110_1-p214256	5357890	-1.19	7.78	T/G	17Sp
	A08	Bn-A08-p8587056	7466643	-0.37	5.77	A/G	18Semi
	A08	Bn-A08-p10068904	8070062	0.56	5.39	T/C	16Win
	A08	Bn-A08-p12781426	10473952	0.51	5.19	A/G	17Semi
	A08	Bn-A08-p12794893	10478870	-0.37- -0.36	5.61-5.35	T/C	17Semi,18Semi
	A08	Bn-A08-p12797532	10481492	-0.35	5.04	A/C	17Semi
	A08	Bn-A08-p12599446	10515601	-0.41- -0.40	5.62-5.86	T/C	17Semi
	A08	Bn-A08-p12814556	10579998	-0.32	5.20	T/C	16Win
	A08	Bn-A08-p12820786	10587675	-0.44- 0.65	5.65-6.43	A/C	16Win,17Sp,17Semi,18Semi
	A08	Bn-A08-p13030439	10839267	0.45	5.46	T/G	16Semi
	A08	Bn-A08-p13036508	10848584	-0.30	5.09	T/C	18Semi
	A08	Bn-scaff_17119_1-p85292	10958606	-0.33	5.67	C/G	16Win
	A08	Bn-A08-p13239816	10991896	-0.28	5.01	T/C	16Win
	A08	Bn-A08-p13352430	11097576	-0.28	5.33	T/C	16Win
	A08	Bn-A08-p13376746	11121237	-0.32	6.70	A/G	16Win
	A08	Bn-A08-p13379983	11124385	-0.33	7.70	T/C	16Win
	A08	Bn-A08-p13382119	11126578	-0.28	5.28	A/G	16Win
	A08	Bn-A08-p13401821	11146632	-0.30	5.98	A/G	16Win
	A08	Bn-A08-p13465514	11215881	-0.28	5.55	A/C	16Win
	A08	Bn-A08-p14056618	11755183	0.42	5.57	T/C	16Win
	A08	Bn-A08-p14351709	12051686	-1.19	7.78	T/G	17Sp
	A08	Bn-A08-p14447288	12146535	-1.19	7.78	T/G	17Sp
	A08	Bn-A08-p15448484	13018991	-1.19	7.78	A/G	17Sp
	A08	Bn-A08-p15740524	13242507	-1.19	7.78	A/G	17Sp
	A08	Bn-A08-p15802943	13299986	-0.35	6.47	T/C	18Win
	A08	Bn-A08-p19009254	16352893	1.19	7.76	T/G	17Sp
	A09	Bn-A09-p1829952	2104391	1.15	5.71	A/G	17Semi
	A09	Bn-A09-p5631441	5213792	-0.37	5.15	A/C	17Win
	A09	Bn-A09-p22344523	19761316	1.19	7.76	T/G	17Sp
	A09	Bn-A09-p22953858	21326253	1.19	7.76	T/G	17Sp
	A09	Bn-scaff_16361_1-p2978691	27568994	0.77	10.07	A/C	18Sp
	A09	Bn-A09-p30058247	27873283	0.56	5.81	A/G	18Sp
	A09	Bn-scaff_16197_1-p3020713	28142159	1.19	7.76	T/C	17Sp
	A09	Bn-A09-p36112515	33233968	-1.04	6.81	T/C	17Sp
	A10	Bn-A10-p3909275	913569	-1.22	5.67	T/C	17Win
	A10	Bn-scaff_17367_1-p866103	5436896	0.53	5.83	C/G	18Sp
	A10	Bn-A10-p12857310	12902317	-1.19	7.78	T/G	17Sp
	A10	Bn-A10-p13786294	13821712	1.03	6.08	T/G	17Sp
	A10	Bn-A10-p14058257	14053005	1.19	7.76	T/C	17Sp
	A10	Bn-A10-p15117055	15060421	0.58	5.99	A/G	18Sp
	A10	Bn-A10-p16213045	15365401	0.58	5.99	A/G	18Sp
	C01	Bn-scaff_19193_1-p927967	5409405	0.5	5.58	A/G	18Sp
	C01	Bn-scaff_17731_1-p569486	6797974	0.54	5.28	A/G	18Sp
	C01	Bn-A01-p12593802	16875948	0.97	15.26	A/G	18Sp
	C01	Bn-scaff_20250_1-p192566	16877584	-1.05	5.40	T/C	17Win
	C01	Bn-scaff_20250_1-p213370	16905308	-1.05	5.40	A/G	17Win
	C01	Bn-scaff_16929_1-p886262	27867888	0.56	5.42	T/C	18Sp
	C01	Bn-A08-p9268915	32559113	0.53	6.36	T/G	18Sp
	C01	Bn-scaff_21015_1-p34786	32559311	0.62	7.94	A/G	18Sp
	C02	Bn-A02-p1085455	13583	0.94	5.37	A/G	17Sp
	C02	Bn-scaff_17725_1-p199859	9801787	0.90	5.14	T/G	16Semi
	C02	Bn-scaff_23813_1-p548372	11944062	1.03	6.24	A/G	16Semi
	C03	Bn-scaff_17298_1-p779577	23106957	-1.22	5.67	A/G	17Win
	C03	Bn-scaff_17298_1-p1471882	23560777	-0.96	6.12	A/G	16Win
	C03	Bn-scaff_16092_1-p815319	28515046	-0.55	5.72	A/G	18Sp
	C03	Bn-scaff_15695_1-p611509	30599420	-0.56	6.45	T/C	18Sp
	C03	Bn-scaff_24631_1-p425420	49314005	0.43	5.05	T/C	16Sp
	C03	Bn-scaff_16394_2-p1431681	49774549	0.99	8.09	T/C	17Sp
	C03	Bn-scaff_15794_3-p165426	55436898	0.55	6.62	T/C	16Semi
	C03	Bn-scaff_15794_3-p164881	55438616	0.54	7.06	A/G	16Semi
	C03	Bn-scaff_15794_3-p164492	55439004	0.55	6.62	A/G	16Semi
	C03	Bn-scaff_15794_3-p164289	55439215	0.55	6.62	T/C	16Semi
	C03	Bn-scaff_15794_3-p154754	55441236	0.54	7.06	T/C	16Semi
	C03	Bn-scaff_15794_3-p154541	55441422	0.55	6.62	T/G	16Semi
	C03	Bn-scaff_15794_3-p154030	55441933	0.54	7.06	T/C	16Semi
	C03	Bn-scaff_15794_3-p153296	55442665	0.46	5.15	A/G	16Semi
	C03	Bn-scaff_15794_3-p147011	55448896	0.48	5.19	T/C	16Semi
	C03	Bn-scaff_15794_3-p146954	55448952	0.46	5.82	A/G	16Semi
	C03	Bn-scaff_15794_3-p34099	55541518	0.50	6.08	T/C	16Semi
	C03	Bn-scaff_15794_3-p33912	55541704	0.55	6.62	T/G	16Semi
	C03	Bn-scaff_15794_3-p33848	55541768	0.55	6.62	A/G	16Semi
	C03	Bn-scaff_15794_3-p33647	55541956	0.55	6.62	A/G	16Semi
	C03	Bn-scaff_15794_3-p32373	55543405	0.55	6.62	T/C	16Semi
	C03	Bn-scaff_15794_3-p32092	55543546	0.48	6.26	T/C	16Semi
	C03	Bn-scaff_15794_3-p29807	55549749	0.55	6.62	A/C	16Semi
	C03	Bn-scaff_15794_3-p29784	55549752	0.55	6.62	A/C	16Semi
	C03	Bn-scaff_15794_3-p75109	55706690	0.54	7.06	A/C	16Semi
	C03	Bn-scaff_15794_3-p75392	55706973	0.55	6.62	A/G	16Semi
	C03	Bn-scaff_15794_3-p75895	55707477	0.48	5.10	A/G	16Semi
	C03	Bn-scaff_15794_3-p84106	55711458	0.50	6.08	T/C	16Semi
	C03	Bn-scaff_15794_3-p84885	55712231	0.55	6.62	T/C	16Semi
	C03	Bn-scaff_15794_3-p85268	55712613	0.53	6.45	A/G	16Semi
	C03	Bn-scaff_15794_3-p89166	55716440	0.53	6.34	A/C	16Semi
	C03	Bn-scaff_15794_3-p89442	55716716	0.53	6.45	T/C	16Semi
	C03	Bn-scaff_15794_3-p89881	55717233	0.55	6.62	T/C	16Semi
	C03	Bn-scaff_15794_3-p89999	55717350	0.49	6.95	T/C	16Semi
	C03	Bn-scaff_15794_3-p108033	55728615	-0.48- 0.72	5.22-8.09	T/G	16Semi,17Semi
	C03	Bn-scaff_15794_3-p137832	55738317	0.55	6.62	T/C	16Semi
	C03	Bn-scaff_16996_1-p283285	56375281	-0.36	6.42	T/C	16Win
	C04	Bn-scaff_16534_1-p399693	2953815	0.86	11.74	T/C	18Sp
	C04	Bn-scaff_15908_1-p60961	5261325	-1.31	9.78	T/C	16Sp
	C04	Bn-scaff_16517_1-p584031	42361813	-0.48	4.99	A/G	18Win
	C05	Bn-scaff_16414_1-p863783	1091070	1.08	7.49	T/A	17Sp
	C05	Bn-scaff_15712_10-p505603	5229784	0.51	6.17	T/G	18Sp
	C05	Bn-A06-p8221017	9624871	0.86	11.74	A/C	18Sp
	C05	Bn-scaff_22770_1-p423063	30137761	1.19	7.76	T/G	17Sp
	C06	Bn-scaff_18549_1-p600676	926911	0.83	12.43	C/G	18Sp
	C06	Bn-scaff_18549_1-p129072	1368140	-0.63	6.93	A/G	18Sp
	C06	Bn-scaff_18549_1-p121747	1377021	-0.63	6.93	A/C	18Sp
	C06	Bn-scaff_18549_1-p114993	1393343	-0.63	6.93	T/G	18Sp
	C06	Bn-scaff_18549_1-p112001	1396328	-0.63	6.93	T/C	18Sp
	C06	Bn-scaff_18549_1-p96084	1413092	-0.63	6.93	T/C	18Sp
	C06	Bn-scaff_18549_1-p95191	1413985	-0.63	6.93	T/G	18Sp
	C06	Bn-scaff_18549_1-p94008	1415168	-0.63	6.93	T/C	18Sp
	C06	Bn-scaff_18549_1-p93687	1415489	-0.63	6.93	A/G	18Sp
	C06	Bn-scaff_21744_1-p6436	1625463	-0.63	6.93	A/C	18Sp
	C06	Bn-scaff_27218_1-p19546	9375688	1.19	7.76	T/C	17Sp
	C06	Bn-scaff_25208_1-p7758	10354861	1.19	7.76	T/C	17Sp
	C06	Bn-scaff_18439_1-p1014445	13137757	-0.98	6.28	T/G	16Sp
	C06	Bn-scaff_15818_2-p1534553	17892403	-0.55	5.4	A/G	18Sp
	C06	Bn-scaff_15763_1-p548135	20121306	-0.83	5.17	T/C	17Sp
	C06	Bn-scaff_18439_1-p208451	24118072	-1.25	10.33	A/G	17Sp
	C06	Bn-scaff_20294_1-p421721	33540207	1.20	8.54	A/G	17Sp
	C08	Bn-scaff_16174_1-p1505515	23749865	-1.31	9.78	A/G	16Sp
	C08	Bn-scaff_16361_1-p1943766	29487844	-1.31	9.78	T/G	16Sp
	C08	Bn-scaff_16445_1-p825012	35978719	0.78	5.32	A/G	17Sp
	C08	Bn-scaff_16389_1-p12505	38113567	-0.86	5.86	A/G	17Sp
	C09	Bn-scaff_15701_1-p43331	10270991	-0.56	5.46	T/C	18Sp
	C09	Bn-scaff_20202_1-p157506	14788366	-0.34	5.55	A/C	16Semi
	C09	Bn-scaff_20202_1-p143881	14804057	-0.33	5.21	A/G	16Semi
	C09	Bn-scaff_20202_1-p143401	14804537	-0.33	5.22	T/G	16Semi
	C09	Bn-scaff_17888_1-p378622	15588233	-0.32	5.55	T/G	16Semi
	C09	Bn-scaff_17888_1-p236380	15753918	-0.34	5.71	A/C	16Semi
	C09	Bn-scaff_17888_1-p231789	15758520	-0.70	6.88	T/C	16Semi
	C09	Bn-scaff_17888_1-p228734	15761575	-0.36	6.18	T/C	16Semi
	C09	Bn-scaff_17888_1-p222048	15768261	-0.35	5.43	T/C	16Semi
	C09	Bn-scaff_17888_1-p170198	15826668	-0.34	5.46	A/C	16Semi
	C09	Bn-scaff_20903_1-p300819	16920322	0.60	6.53	A/G	16Semi
	C09	Bn-scaff_18944_1-p566719	19915878	-1.19	7.78	A/G	17Sp
	C09	Bn-scaff_15930_1-p204804	33113665	1.19	7.76	A/G	17Sp
	C09	Bn-scaff_16456_1-p453404	35037965	0.86	11.74	T/C	18Sp
	C09	Bn-scaff_16456_1-p415818	35068732	0.75	11.1	T/C	18Sp
	C09	Bn-scaff_16456_1-p406379	35075252	0.86	11.74	T/G	18Sp
	C09	Bn-scaff_17109_2-p188015	46096485	0.58	5.99	A/G	18Sp
C18:0	A01	Bn-A01-p26369651	20893064	-0.43	11.41	T/C	17Sp
	A02	Bn-A02-p6156818	3319912	-0.42	11.25	T/C	17Sp
	A03	Bn-scaff_15762_1-p670319	7355650	-0.96	6.12	T/C	16Win
	A03	Bn-A03-p19897251	18786391	-0.11	5.12	T/G	16Semi
	A03	Bn-A03-p21210189	19959523	0.22	5.01	A/C	18Win
	A03	Bn-A03-p21942870	20741914	-0.31	6.65	T/G	17Sp
	A03	Bn-A03-p27339890	25582011	-0.39	10.02	A/G	17Sp
	A03	Bn-A03-p28560659	27022904	-0.67	5.13	T/C	16Win
	A05	Bn-A05-p2841024	2901950	0.42	5.08	T/G	18Sp
	A06	Bn-A06-p4317300	4115935	-0.39	5.01	T/G	18Sp
	A06	Bn-A06-p6341389	5792362	0.25	5.22	A/G	17Sp
	A07	Bn-A07-p8451913	9888407	-0.44	5.63	A/G	16Sp
	A07	Bn-A07-p8545569	9993604	-0.42	5.81	T/C	16Sp
	A07	Bn-A07-p14062366	15980703	0.27	5.84	A/G	17Sp
	A07	Bn-A07-p17477080	19366919	-0.3	7.15	T/C	17Sp
	A07	Bn-A07-p17520539	19406966	-0.31	6.21	T/C	17Sp
	A07	Bn-A07-p22136602	23524106	-0.31	6.21	T/C	17Sp
	A07	Bn-A07-p22156609	23538534	-0.31	6.21	T/C	17Sp
	A08	Bn-A08-p6164968	5233054	0.48	5.59	A/G	18Semi
	A08	Bn-A08-p6268593	5328102	0.45	5.08	A/T	18Semi
	A08	Bn-A08-p6282126	5334539	0.45	5.08	A/G	18Semi
	A08	Bn-A08-p6299307	5351170	0.45	5.08	T/C	18Semi
	A08	Bn-A08-p8480536	7330800	0.23	5.17	T/C	17Sp
	A08	Bn-A08-p10068904	8070062	0.56	5.39	T/C	16Win
	A08	Bn-A08-p12814556	10579998	-0.32	5.2	T/C	16Win
	A08	Bn-A08-p12820786	10587675	-0.33	5.78	A/C	16Win
	A08	Bn-scaff_17119_1-p85292	10958606	-0.33	5.67	C/G	16Win
	A08	Bn-A08-p13239816	10991896	-0.28	5.01	T/C	16Win
	A08	Bn-A08-p13352430	11097576	-0.28	5.33	T/C	16Win
	A08	Bn-A08-p13376746	11121237	-0.32	6.7	A/G	16Win
	A08	Bn-A08-p13379983	11124385	-0.33	7.7	T/C	16Win
	A08	Bn-A08-p13382119	11126578	-0.28	5.28	A/G	16Win
	A08	Bn-A08-p13401821	11146632	-0.3	5.98	A/G	16Win
	A08	Bn-A08-p13465514	11215881	-0.28	5.55	A/C	16Win
	A08	Bn-A08-p14056618	11755183	0.42	5.57	T/C	16Win
	A08	Bn-A08-p15802943	13299986	-0.18	5.89	T/C	18Win
	A09	Bn-A09-p1756759	2180009	-0.16	5.03	T/C	16Semi
	A09	Bn-A09-p3029767	2949844	-0.15	4.98	A/G	18Win
	A09	Bn-A09-p3234323	3135040	0.21	5.3	A/G	16Semi,17Sp
	A09	Bn-A09-p5631441	5213792	-0.37	5.15	A/C	17Win
	A09	Bn-A09-p7332680	5539685	-0.25	5.58	A/G	17Sp
	A09	Bn-A09-p7329993	5542359	-0.27	7.85	T/C	17Sp
	A09	Bn-scaff_18826_1-p980817	6243921	-0.46	5.13	T/C	16Sp
	A09	Bn-A09-p15648941	11460219	-0.43	11.41	A/C	17Sp
	A09	Bn-A09-p5157169	29734047	-0.43	11.41	A/C	17Sp
	A10	Bn-A10-p3909275	913569	-1.22	5.67	T/C	17Win
	A10	Bn-A10-p7069659	8652208	-0.42	11.25	A/G	17Sp
	A10	Bn-A10-p13965313	13956813	-0.43	11.41	T/C	17Sp
	A10	Bn-A10-p15863972	15695058	0.19	5.12	A/C	17Sp
	C01	Bn-scaff_20250_1-p192566	16877584	-1.05	5.4	T/C	17Win
	C01	Bn-scaff_20250_1-p213370	16905308	-1.05	5.4	A/G	17Win
	C03	Bn-scaff_20646_1-p926102	17133919	-0.43	11.41	C/G	17Sp
	C03	Bn-scaff_17298_1-p779577	23106957	-1.22	5.67	A/G	17Win
	C03	Bn-scaff_17298_1-p1471882	23560777	-0.96	6.12	A/G	16Win
	C03	Bn-A08-p10716777	52144559	0.23	5.03	T/C	18Sp
	C03	Bn-scaff_17457_1-p493971	53921047	-0.27	6	T/C	17Semi
	C03	Bn-scaff_16996_1-p283285	56375281	-0.36	6.42	T/C	16Win
	C04	Bn-scaff_17686_1-p237552	13732397	-0.28	6.63	A/G	17Sp
	C04	Bn-scaff_15585_1-p276555	44214027	-0.43	11.41	T/G	17Sp
	C04	Bn-scaff_16888_1-p1347380	45497825	-0.43	11.41	T/C	17Sp
	C05	Bn-scaff_20901_1-p2116985	1889358	-0.25	5.43	A/G	17Sp
	C05	Bn-scaff_20901_1-p1505546	2515848	-0.43	11.41	T/C	17Sp
	C05	Bn-scaff_18181_1-p1691104	6103006	-0.43	11.41	T/G	17Sp
	C05	Bn-scaff_18762_1-p59746	30868461	-0.25	5.43	T/G	17Sp
	C06	Bn-scaff_18439_1-p1013430	13136742	0.26	5.19	T/C	17Sp
	C06	Bn-scaff_15892_1-p612087	26516072	-0.22	5.74	A/G	17Sp
	C06	Bn-scaff_15892_1-p623966	26531035	-0.22	5.74	A/G	17Sp
	C06	Bn-scaff_15892_1-p1170714	27032083	-0.35	10.52	T/G	17Sp
	C08	Bn-scaff_16445_1-p2528516	34365293	0.12	5.09	T/C	16Semi
	C09	Bn-scaff_20428_1-p312666	8328173	-0.31	6.21	A/G	17Sp
	C09	Bn-scaff_17174_1-p62030	13393631	-0.43	11.41	T/C	17Sp
	C09	Bn-scaff_17367_1-p346946	32287769	-0.27	5.42	A/C	17Sp
C18:1	A01	Bn-A01-p2825565	2327566	17.15	8.27	T/C	16Semi
	A01	Bn-A01-p3993078	3627721	14.65	5.83	T/C	18Sp
	A01	Bn-A01-p4167795	3847687	15.95	6.57	T/G	18Sp
	A01	Bn-A01-p14001039	11571928	21.46	11.48	A/G	18Sp
	A01	Bn-A05-p23466337	16089798	21.13	11.83	T/C	18Sp
	A01	Bn-A01-p22051021	18668332	21.46	11.48	A/C	18Sp
	A01	Bn-A01-p22085117	18711173	21.65	11.54	T/G	18Sp
	A01	Bn-A01-p23943508	20037023	16.55	5.16	A/G	17Sp
	A01	Bn-A01-p26369651	20893064	21.65	11.54	T/C	18Sp
	A02	Bn-scaff_16269_1-p242401	3741653	13.8	5.35	T/C	18Sp
	A02	Bn-A02-p9464293	6271471	15.61	6.42	T/C	18Sp
	A02	Bn-A02-p10591779	7458917	15.3	7.37	T/C	18Sp
	A02	Bn-A02-p10681015	7547374	-17.08	5.78	T/G	18Sp
	A02	Bn-A02-p11356944	8016133	11.47	5.73	A/G	18Sp
	A02	Bn-A02-p11284285	8292886	9.35	5.3	T/C	18Sp
	A02	Bn-A02-p11789023	8492822	11.23	5.1	A/G	18Sp
	A02	Bn-A02-p11939715	8652572	-7.07	5.86	A/C	18Win
	A02	Bn-A02-p11996587	8703224	25.82	5.14	T/G	16Semi
	A02	Bn-A02-p12028821	8733654	9.78	5.54	A/G	18Sp
	A02	Bn-A02-p12284078	9000295	14.17	6.29	A/C	18Sp
	A02	Bn-A02-p15569271	11995190	21.46	11.48	T/C	18Sp
	A02	Bn-A02-p16526928	12747101	21.46	11.48	A/G	18Sp
	A02	Bn-A02-p16529092	12749267	21.46	11.48	A/T	18Sp
	A02	Bn-A02-p19343485	18320837	16.25	5.87	A/G	16Sp
	A02	Bn-A02-p21061002	18906336	21.46	11.48	T/A	18Sp
	A02	Bn-A02-p22395060	20766438	16.26	5.03	A/G	17Sp
	A02	Bn-A02-p22386317	20775741	-19.76	5.74	A/C	18Sp
	A03	Bn-A03-p830116	707624	16.31	5.53	A/C	17Sp
	A03	Bn-A03-p14153283	13346806	21.46	11.48	T/G	18Sp
	A03	Bn-A03-p20369417	19241578	33.77	6.16	A/G	17Semi
	A03	Bn-A03-p20417630	19283838	33.77	6.16	A/G	17Semi
	A03	Bn-A03-p26309336	24699271	15.37	6.61	A/G	18Sp
	A03	Bn-A03-p27337536	25579664	21.13	11.83	A/G	18Sp
	A04	Bn-A04-p9543969	10682883	13.55	5.16	A/G	18Sp
	A04	Bn-A04-p14687930	15158346	13.22	5.17	T/A	18Sp
	A05	Bn-A05-p2840734	2901659	15.32	8.08	A/G	18Sp
	A05	Bn-A05-p4230422	4106599	13.44	5.54	T/G	18Sp
	A05	Bn-A05-p4418703	4287621	14.15	5.83	T/C	18Sp
	A05	Bn-A05-p5100352	4920148	14.39	6.37	A/G	18Sp
	A05	Bn-scaff_22002_1-p155273	14235909	38.51	6.41	A/G	17Sp
	A05	Bn-A05-p20425452	18636249	21.65	11.54	T/C	18Sp
	A07	Bn-A07-p9512042	10867491	16.76	8.04	A/G	18Sp
	A07	Bn-A07-p13715621	15709981	21.46	11.48	T/C	18Sp
	A07	Bn-A07-p14121891	16038710	21.46	11.48	T/G	18Sp
	A07	Bn-A07-p17520539	19406966	25.82	5.14	T/C	16Semi
	A08	Bn-A08-p2590415	2026514	17.99	6.25	T/G	16Semi
	A08	Bn-A08-p2711497	2151791	19.05	6.87	A/G	16Semi
	A08	Bn-scaff_16022_1-p861	2175405	17.97	6.77	T/C	16Semi
	A08	Bn-A08-p3182594	2666734	-10.08	5.18	T/G	18Win
	A08	Bn-A08-p3518817	2901967	18.54	5.21	A/G	16Semi
	A08	Bn-A08-p3529278	2909456	9.81	5.1	T/G	16Semi
	A08	Bn-Scaffold000283-p1502	3214985	16.12	6.1	T/G	16Semi
	A08	Bn-Scaffold000259-p29271	3346565	18.43	5.05	T/C	16Semi
	A08	Bn-A08-p4000353	3400768	18.43	5.05	A/G	16Semi
	A08	Bn-A08-p4077507	3476858	20.87	7.15	T/C	16Semi
	A08	Bn-A08-p4207231	3626292	21.32	6.46	A/G	16Semi
	A08	Bn-A08-p4347992	3753014	12.1	5.45	T/G	16Semi
	A08	Bn-A08-p4353407	3758432	21.01	6.49	T/G	16Semi
	A08	Bn-A08-p4407886	3815148	18.82-18.95	6.00-6.26	T/C	16Semi,17Semi
	A08	Bn-A08-p4413411	3820740	21.01	6.49	A/G	16Semi
	A08	Bn-A08-p5491239	4749486	18.43	5.05	A/C	16Semi
	A08	Bn-A08-p6164225	5232300	-11.15- -10.90	5.53-5.94	T/C	17Semi,18Semi
	A08	Bn-A08-p6164968	5233054	18.14	5.34	A/G	18Semi
	A08	Bn-A08-p6170057	5238176	-9.05	5	A/G	18Win
	A08	Bn-A08-p6246411	5307302	-9.09	5.91	T/C	18Win
	A08	Bn-A08-p6268593	5328102	18.07	5.46	A/T	18Semi
	A08	Bn-A08-p6282126	5334539	18.07	5.46	A/G	18Semi
	A08	Bn-A08-p6299307	5351170	18.07	5.46	T/C	18Semi
	A08	Bn-Scaffold000219-p12098	5924131	-9.2	6.4	A/G	18Win
	A08	Bn-A08-p7814432	6786988	18.13-20.45	5.18-7.38	A/C	17Semi,18Semi
	A08	Bn-A08-p7851497	6825015	10.56	5.57	A/G	16Semi
	A08	Bn-A08-p8091811	7078853	18.07	5.3	T/C	16Semi
	A08	Bn-A08-p8396508	7205103	20.87	6.13	G/C	16Semi
	A08	Bn-A08-p8480734	7330998	13.93	6.3	A/C	18Sp
	A08	Bn-A08-p8587056	7466643	-12.07-11.9	6.11-7.06	A/G	16Semi,17Semi,18Semi
	A08	Bn-A08-p8658074	7529548	-11.69	5.24	T/C	16Win
	A08	Bn-A08-p8755323	7621328	18.99	6.61	T/C	16Semi
	A08	Bn-A08-p8909433	7774654	-9.46	5.35	T/C	18Win
	A08	Bn-A08-p10026421	8026232	13.44	5.72	T/G	16Semi
	A08	Bn-A08-p10068904	8070062	18.28-30.49	5.50-12.15	T/C	16Win,16Semi,17Sp,17Win,18Semi
	A08	Bn-A08-p10071208	8077834	-15.15- -11.51	7.36-9.22	T/C	16Win,17Win,18Win
	A08	Bn-A08-p10215623	8163002	-12.31- -10.85	5.70-6.31	A/C	17Semi,18Semi
	A08	Bn-A08-p10222411	8166360	-11.18	5.37	A/C	18Semi
	A08	Bn-A08-p10329729	8285957	-9.37- -8.27	5.01-5.10	T/G	16Win,18Win
	A08	Bn-A08-p10774582	8683445	-10.94- -10.41	4.99-5.62	A/G	16Win,17Semi,18Semi
	A08	Bn-A08-p11452221	9295268	-10.07- -8.46	5.34-5.46	A/C	17Win,18Win
	A08	Bn-A08-p11667191	9509349	-11.57-20.51	5.13-7.35	T/G	16Sp,17Sp,17Semi,18Semi
	A08	Bn-A08-p12556455	10335312	-11.63-14.17	5.61-6.35	T/C	16Win,17Sp,17Win
	A08	Bn-A08-p12559372	10338217	12.30-16.99	5.04-7.67	A/C	16Sp,17Sp
	A08	Bn-A08-p12752628	10449877	-10.31-15.99	5.29-6.98	T/C	16Win,17Sp
	A08	Bn-A08-p12781426	10473952	16.22	5.16	A/G	18Semi
	A08	Bn-A08-p12794893	10478870	-12.67-15.46	5.33-6.77	T/C	16Sp,17Sp,17Semi,18Semi
	A08	Bn-A08-p12797532	10481492	-11.42-19.58	5.31-9.80	A/C	17Sp,17Semi,18Semi
	A08	Bn-A08-p12599446	10515601	-14.67-19.77	5.85-12.45	T/C	16Sp,16Win,16Semi,17Sp,17Semi,18Semi
	A08	Bn-A08-p12814556	10579998	-12.78-16.42	5.02-7.45	T/C	16Sp,16Semi,17Sp,17Semi,18Semi
	A08	Bn-A08-p12820786	10587675	-15.90-22.19	9.23-13.42	A/C	16Sp,16Semi,17Sp,17Semi,18Semi
	A08	Bn-A08-p12836248	10616096	18.82	9.19	T/G	18Sp
	A08	Bn-A08-p12940197	10716399	16.52-18.56	9.35-9.90	T/C	16Sp,17Sp
	A08	Bn-A08-p13011710	10787813	17.04	8.21	A/G	17Sp
	A08	Bn-A08-p13030362	10839190	-9.86-10.64	5.01-5.57	A/C	16Semi,17Semi
	A08	Bn-A08-p13030439	10839267	14.78	11.58	T/G	16Semi
	A08	Bn-A08-p13036508	10848584	-10.16-11.72	5.76-8.17	T/C	16Win,17Semi,18Semi
	A08	Bn-A08-p13060591	10872038	13.86-15.05	5.46-10.43	A/G	16Semi,17Sp
	A08	Bn-A08-p13066424	10878218	13.34	13.78	T/C	16Semi
	A08	Bn-scaff_17821_1-p119310	10883841	10.79-17.09	5.90-6.20	A/G	16Sp,16Semi,17Sp
	A08	Bn-A08-p13221380	10967902	19.06	7.84	T/G	16Semi
	A08	Bn-A08-p13239621	10991701	12.22	6.57	T/C	16Semi
	A08	Bn-A08-p13271950	11040796	15.31	5.43	T/C	17Sp
	A08	Bn-A08-p13352430	11097576	14.4	6.47	T/C	16Sp
	A08	Bn-A08-p14327570	12029770	25.82	5.14	T/C	16Semi
	A08	Bn-A08-p14493385	12192499	17.69	6.15	A/G	16Sp
	A08	Bn-A08-p14500962	12201971	10.89	5.14	T/C	16Sp
	A08	Bn-A08-p14512862	12213571	13.62	5.29	A/G	17Sp
	A08	Bn-A08-p15802943	13299986	14.33	5.85	T/C	16Sp
	A08	Bn-A08-p16521179	13985519	14.84	7.01	A/G	16Sp
	A08	Bn-scaff_24726_1-p33555	14029706	21.77-21.87	5.47-8.52	A/G	16Sp,17Sp
	A09	Bn-A09-p1929245	2026506	11.17	6.23	T/C	16Sp
	A09	Bn-A01-p9125819	2472810	-11.71- -10.70	6.41-6.89	T/G	16Win,17Win
	A09	Bn-A01-p9004629	2580834	-11.12- -10.73	5.40-5.90	T/C	16Win,18Semi
	A09	Bn-A09-p3024539	2944564	-17.47	5.23	T/C	18Semi
	A09	Bn-A09-p3029767	2949844	-12.82- -10.35	6.96-7.13	A/G	17Win,18Win
	A09	Bn-A09-p3047090	2966602	-15.89-14.80	5.97-7.01	A/G	17Win,18Win
	A09	Bn-A09-p3051349	2971334	-13.16- -11.24	6.63-7.53	T/C	17Win,18Win,18Semi
	A09	Bn-A09-p3097420	3031273	-12.45- -11.08	5.63-6.81	T/G	17Win,18Win
	A09	Bn-A09-p3116738	3051909	-12.58- -10.42	6.15-6.38	A/G	17Win,18Win
	A09	Bn-A09-p4475636	4388001	12.06	6.10	A/G	16Sp
	A09	Bn-A09-p7741917	6875367	21.46	11.48	T/C	18Sp
	A09	Bn-A09-p15648941	11460219	21.65	11.54	A/C	18Sp
	A09	Bn-A09-p26874249	24934319	16.44	7.16	T/C	18Sp
	A09	Bn-A09-p29617756	27436058	13.57	5.23	A/G	18Sp
	A09	Bn-A09-p29628819	27447511	13.99	6.36	A/G	18Sp
	A09	Bn-scaff_16361_1-p2978691	27568994	22.7	13.85	A/C	18Sp
	A09	Bn-A09-p30058247	27873283	14.45	5.95	A/G	18Sp
	A09	Bn-A09-p30344978	28127637	18.82	9.81	A/G	18Sp
	A09	Bn-A09-p5157169	29734047	21.65	11.54	A/C	18Sp
	A09	Bn-A09-p32104974	29995505	21.46	11.48	T/A	18Sp
	A09	Bn-A09-p32884256	30637433	16.44	7.16	T/G	18Sp
	A10	Bn-scaff_16414_1-p1072066	924566	16.44	7.16	A/C	18Sp
	A10	Bn-scaff_17367_1-p866103	5436896	16.8	8.9	C/G	18Sp
	A10	Bn-A10-p5819027	5451194	18.98	13.08	A/C	18Sp
	A10	Bn-A10-p5831782	5464372	10	5.65	A/C	18Sp
	A10	Bn-A10-p5832645	5465234	10.76	6.84	T/C	18Sp
	A10	Bn-A10-p5845294	5477102	11.58	6.02	A/G	18Sp
	A10	Bn-A10-p3512464	6872875	16.79	7.54	T/A	18Sp
	A10	Bn-A10-p13965313	13956813	21.65	11.54	T/C	18Sp
	A10	Bn-A10-p14914898	14852876	15.81	8.19	T/G	18Sp
	A10	Bn-A10-p15169777	15102698	12.38	7.12	T/C	18Sp
	A10	Bn-A10-p16187017	15385541	16.52	9.19	T/C	18Sp
	A10	Bn-A10-p15658567	15908867	22.39	13.88	T/C	18Sp
	C01	Bn-scaff_19244_1-p408047	351146	9.64	7.46	A/G	16Sp
	C01	Bn-scaff_15838_5-p160091	3030589	11.33	5.69	A/G	16Sp
	C01	Bn-scaff_15838_5-p165094	3035591	12.5	6.63	T/G	16Sp
	C01	Bn-scaff_15838_5-p693736	3527814	9.28	5.04	A/G	16Sp
	C01	Bn-scaff_15838_5-p884827	3717929	15.66	6.65	T/C	18Sp
	C01	Bn-scaff_19193_1-p875889	5468648	15.66	6.65	T/C	18Sp
	C01	Bn-scaff_17827_1-p963588	7866768	13.36	5.98	A/G	18Sp
	C01	Bn-A01-p12593802	16875948	15.61	6.42	A/G	18Sp
	C01	Bn-scaff_17959_1-p284214	19958853	21.46	11.48	T/G	18Sp
	C01	Bn-A01-p21244027	31853318	25.82	5.14	T/C	16Semi
	C01	Bn-scaff_21015_1-p34786	32559311	19.89	13.22	A/G	18Sp
	C02	Bn-scaff_16565_1-p1065413	12539608	22.39	13.88	T/A	18Sp
	C02	Bn-scaff_17177_1-p546184	44656729	-11.08- -10.13	6.22-6.69	T/G	16Win,17Win
	C02	Bn-scaff_17177_1-p381225	44843892	-10.21- -9.4	5.40-5.69	T/A	16Win,17Win
	C02	Bn-scaff_17177_1-p365264	44856141	-11.56	5.74	A/G	18Semi
	C02	Bn-scaff_26086_1-p11779	44930080	-9.85- -9.03	5.24-5.61	A/G	16Win,17Win
	C02	Bn-scaff_16139_1-p1285098	45260203	-10.50- -9.14	5.11-6.11	A/G	16Win,17Win
	C02	Bn-scaff_16139_1-p1282857	45262444	-11.48- -9.17	5.52-8.23	T/G	16Win,17Win
	C02	Bn-scaff_16139_1-p1281699	45263602	-11.02- -8.95	5.08-7.17	A/C	16Win,17Win
	C02	Bn-scaff_16139_1-p1280921	45264380	-11.49- -9.6	5.89-7.86	T/C	16Win,17Win
	C02	Bn-scaff_16139_1-p1279588	45265713	-11.25- -9.77	6.11-7.42	T/C	16Win,17Win
	C02	Bn-scaff_16139_1-p1277806	45267495	-11.84- -9.9	6.45-8.71	A/G	16Win,17Win
	C02	Bn-scaff_16139_1-p1276670	45268631	-9.73- -9.05	5.20-5.42	T/C	16Win,17Win
	C02	Bn-scaff_16139_1-p1275964	45269337	-11.14- -9.24	5.92-8.10	T/C	16Win,17Win
	C02	Bn-scaff_16139_1-p1275385	45269916	-11.46- -9.99	6.33-7.65	A/G	16Win,17Win
	C02	Bn-scaff_16139_1-p1271693	45273512	-9.31- -8.41	5.20-5.97	T/C	16Win,17Win
	C02	Bn-scaff_16139_1-p1267495	45277028	-11.46- -9.99	6.33-7.65	A/G	16Win,17Win
	C02	Bn-scaff_16139_1-p1267317	45277206	-9.74- -8.43	5.48-6.98	T/G	16Win,17Win
	C02	Bn-scaff_16139_1-p1090344	45419101	-10.19	5.52	A/C	17Win
	C03	Bn-scaff_16002_1-p1603062	12801259	16.44	7.16	A/G	18Sp
	C03	Bn-scaff_20646_1-p926102	17133919	21.65	11.54	C/G	18Sp
	C03	Bn-scaff_15747_2-p387345	33586323	25.82	5.14	T/C	16Semi
	C03	Bn-scaff_24631_1-p415987	49299855	14.59	9.68	T/C	16Sp
	C03	Bn-scaff_24631_1-p422231	49305992	16.07	8.8	T/G	17Sp
	C03	Bn-scaff_24631_1-p422377	49306139	15.01	9.52	T/C	16Sp
	C03	Bn-scaff_24631_1-p424973	49313548	15.11-15.95	7.01-8.74	T/C	16Sp,17Sp
	C03	Bn-scaff_24631_1-p425420	49314005	16.95-14.30	5.57-13.65	T/C	16Sp,17Sp
	C03	Bn-scaff_16394_2-p1446065	49757379	15.54	7.27	T/C	16Sp
	C03	Bn-scaff_16394_2-p979621	50268260	14.81	6.67	A/G	16Sp
	C03	Bn-scaff_16394_2-p979398	50268483	16.93	8.94	T/G	16Sp
	C03	Bn-scaff_16394_2-p908960	50348580	14.72	5.91	T/C	16Sp
	C03	Bn-scaff_16394_2-p907669	50349800	14.81	6.67	A/G	16Sp
	C03	Bn-scaff_16394_2-p883613	50360483	14.72	5.91	T/C	16Sp
	C03	Bn-scaff_16394_2-p883473	50360611	14.72	5.91	A/C	16Sp
	C03	Bn-scaff_16394_2-p383438	50992029	13.22	5.26	T/C	16Sp
	C03	Bn-scaff_16394_2-p330427	51025106	13.71	5.98	A/C	16Sp
	C03	Bn-scaff_16394_2-p50433	51371498	12.91	5.18	T/G	16Sp
	C03	Bn-scaff_18602_1-p24405	51427987	13.37	6.2	A/C	16Sp
	C03	Bn-scaff_18602_1-p262006	51659127	14.14	5.2	A/G	16Sp
	C03	Bn-scaff_18602_1-p262920	51660041	15.26	6.59	A/C	16Sp
	C03	Bn-scaff_17457_1-p493971	53921047	-13.05- -12.42	7.09-7.29	T/C	16Win,17Win
	C03	Bn-scaff_17457_1-p283145	54255211	-13.30- -11.34	5.06-8.36	A/G	16Win,17Win
	C03	Bn-scaff_17457_1-p282932	54255426	-13.80- -12.20	5.76-8.87	T/C	16Win,17Win
	C03	Bn-scaff_17457_1-p244526	54300301	-10.61	5.57	A/G	16Win
	C03	Bn-scaff_17457_1-p226230	54315844	-11.03	7.08	T/C	16Win
	C03	Bn-scaff_17457_1-p225774	54316299	-10.61	5.57	A/G	16Win
	C03	Bn-scaff_17457_1-p207055	54332526	-10.57	5.38	A/G	16Win
	C03	Bn-scaff_17457_1-p206860	54332722	-10.61	5.57	A/G	16Win
	C03	Bn-scaff_17457_1-p206743	54332839	-11.7	6.32	T/C	16Win
	C03	Bn-scaff_17457_1-p189441	54355633	-10.92	5.36	A/C	16Win
	C03	Bn-scaff_17457_1-p188947	54355902	-10.61	5.57	A/G	16Win
	C03	Bn-scaff_17457_1-p187334	54357585	-11.24	5.65	T/C	16Win
	C03	Bn-scaff_17457_1-p187316	54357603	-10.61	5.57	A/G	16Win
	C03	Bn-scaff_17457_1-p178572	54362201	-11.7	6.32	T/C	16Win
	C03	Bn-scaff_17457_1-p178466	54362341	-11.48	6.59	T/G	16Win
	C03	Bn-scaff_17457_1-p177567	54363226	-10.52	5.42	T/G	16Win
	C03	Bn-scaff_15794_3-p164881	55438616	14.15	7.59	A/G	16Semi
	C03	Bn-scaff_15794_3-p154754	55441236	14.15	7.59	T/C	16Semi
	C03	Bn-scaff_15794_3-p154030	55441933	14.15	7.59	T/C	16Semi
	C03	Bn-scaff_15794_3-p146954	55448952	13.11	7.99	A/G	16Semi
	C03	Bn-scaff_15794_3-p32092	55543546	13.74	8.54	T/C	16Semi
	C03	Bn-scaff_15794_3-p75109	55706690	14.15	7.59	A/C	16Semi
	C03	Bn-scaff_15794_3-p89999	55717350	14.46	10.88	T/C	16Semi
	C03	Bn-scaff_15794_3-p108033	55728615	16.07	6.17	T/G	16Semi
	C03	Bn-A08-p12660208	56050681	-25.73	5.64	A/C	17Sp
	C03	Bn-scaff_16996_1-p283285	56375281	-12.19	6.31	T/C	16Win
	C03	Bn-A08-p12905848	56466150	12.99-16.42	5.72-7.45	A/C	16Sp,17Sp
	C03	Bn-scaff_17119_1-p114444	56783871	15.9	5.11	T/C	16Semi
	C03	Bn-scaff_23761_1-p604385	57766095	-11.49	6.02	A/G	17Win
	C03	Bn-scaff_23761_1-p604385	57766095	-9.19	5.05	A/G	18Win
	C03	Bn-scaff_23761_1-p629838	57793005	-11.01	5.69	A/G	17Win
	C03	Bn-scaff_23761_1-p670245	57826088	-11.01	5.69	A/G	17Win
	C03	Bn-scaff_23761_1-p678860	57834399	-11.01	5.69	T/G	17Win
	C03	Bn-scaff_23761_1-p679099	57834638	-11.01	5.69	A/G	17Win
	C03	Bn-scaff_23761_1-p682519	57837438	-9.08	5.05	T/C	17Win
	C03	Bn-scaff_23761_1-p704887	57861247	-11.55	5.83	A/G	17Win
	C04	Bn-scaff_16534_1-p399693	2953815	15.95	6.57	T/C	18Sp
	C04	Bn-scaff_16534_1-p2589323	5172318	12.22	5.08	A/C	18Sp
	C04	Bn-scaff_16394_1-p1090896	32408105	15	6.18	A/C	18Sp
	C04	Bn-scaff_16394_1-p1121499	32474946	15	6.18	A/G	18Sp
	C04	Bn-scaff_16394_1-p1129497	32479022	15	6.18	A/G	18Sp
	C04	Bn-scaff_16876_1-p1178318	33759393	12.87	5.39	A/G	17Sp
	C04	Bn-A04-p8178053	34768905	27.19	6.17	T/C	17Semi
	C04	Bn-scaff_16214_1-p529898	43596049	21.47	13.3	G/C	18Sp
	C04	Bn-A06-p8545758	43596727	21.47	13.3	A/T	18Sp
	C04	Bn-scaff_15585_1-p276555	44214027	21.65	11.54	T/G	18Sp
	C04	Bn-scaff_15585_1-p291968	44230930	18.82	9.19	T/G	18Sp
	C04	Bn-scaff_15585_1-p368364	44297353	18.82	9.19	A/C	18Sp
	C04	Bn-scaff_15585_1-p368724	44297772	18.82	9.19	T/C	18Sp
	C04	Bn-scaff_16888_1-p1347380	45497825	21.65	11.54	T/C	18Sp
	C04	Bn-scaff_18903_1-p497762	47649170	21.46	11.48	T/C	18Sp
	C04	Bn-scaff_18903_1-p497804	47649214	21.46	11.48	A/C	18Sp
	C05	Bn-scaff_20901_1-p1505546	2515848	21.65	11.54	T/C	18Sp
	C05	Bn-scaff_20901_1-p1279675	2707569	-16.88	5.07	T/C	16Semi
	C05	Bn-scaff_18181_1-p1691104	6103006	21.65	11.54	T/G	18Sp
	C05	Bn-A06-p8221017	9624871	15.95	6.57	A/C	18Sp
	C05	Bn-scaff_23937_1-p36794	14356298	38.09	5.73	T/C	17Win
	C05	Bn-scaff_22099_1-p251444	24830406	21.19	12.02	C/G	18Sp
	C05	Bn-scaff_18589_1-p76811	29685677	16.44	7.16	T/C	18Sp
	C05	Bn-A07-p541617	36934827	21.65	11.54	T/G	18Sp
	C06	Bn-scaff_17984_1-p738580	9547979	38.09	5.73	C/G	17Win
	C06	Bn-scaff_20294_1-p421721	33540207	21.65	11.54	A/G	18Sp
	C07	Bn-scaff_22301_1-p41757	8940554	38.09	5.73	A/G	17Win
	C07	Bn-scaff_15754_1-p802584	27237297	15.75	8.2	A/G	18Sp
	C07	Bn-scaff_15754_1-p827585	27281539	15.75	8.2	G/C	18Sp
	C07	Bn-scaff_18520_1-p362416	32217199	-25.9	5.95	T/C	17Sp
	C07	Bn-scaff_15705_1-p1415123	34719298	13.07	5.29	A/G	16Win
	C07	Bn-scaff_15705_1-p1719177	34995636	-8.14	5.31	A/G	18Win
	C07	Bn-scaff_16069_1-p431757	36777489	17.65	8.45	A/G	18Sp
	C07	Bn-scaff_16110_1-p2557297	42337856	17.54	8.96	A/G	18Sp
	C07	Bn-scaff_16110_1-p2554704	42340445	17.54	8.96	A/G	18Sp
	C08	Bn-A08-p6162660	14268534	-19.5	5.91	A/G	18Win
	C08	Bn-scaff_16770_1-p2909313	25418777	18.74	5.39	A/G	17Sp
	C08	Bn-scaff_26391_1-p261330	28365082	14.4	5.93	T/C	18Sp
	C08	Bn-scaff_16361_1-p2793822	30283886	21.49	12.95	A/G	18Sp
	C08	Bn-scaff_16361_1-p3265282	30742757	25.82	5.14	A/C	16Semi
	C08	Bn-scaff_16197_1-p2968446	31306568	-27.13	7.56	A/C	17Sp
	C08	Bn-scaff_16197_1-p2958264	31316700	-21.98	5.05	T/C	17Sp
	C08	Bn-scaff_16197_1-p222284	33797284	38.09	5.73	T/A	17Win
	C08	Bn-scaff_21269_1-p121333	36981334	21.13	11.83	A/C	18Sp
	C09	Bn-scaff_17683_1-p313031	8500380	21.46	11.48	T/A	18Sp
	C09	Bn-scaff_17174_1-p62030	13393631	21.65	11.54	T/C	18Sp
	C09	Bn-scaff_15930_1-p105169	33300046	38.09	5.73	G/C	17Win
	C09	Bn-scaff_16456_1-p453404	35037965	15.95	6.57	T/C	18Sp
	C09	Bn-scaff_16456_1-p415818	35068732	17.83	9.32	T/C	18Sp
	C09	Bn-scaff_16456_1-p406379	35075252	15.95	6.57	T/G	18Sp
	C09	Bn-scaff_17028_1-p168304	42677838	13.62	5.11	G/C	18Sp
C18:2	A01	Bn-A01-p2221110	1704123	2.47	5.33	T/G	17Semi
	A01	Bn-A01-p4167795	3847687	5.28	7.15	T/G	18Sp
	A01	Bn-A05-p23466337	16089798	5.39	6.62	T/C	17Sp
	A01	Bn-A01-p22768523	18948284	-6.37	7.72	T/C	17Sp
	A01	Bn-A01-p28049872	21963726	-8.81	15.95	A/C	17Sp
	A02	Bn-scaff_16565_1-p1062007	6923746	4.98	5.52	T/C	17Sp
	A03	Bn-A03-p20369417	19241578	5.81	7.04	A/G	17Semi
	A03	Bn-A03-p20417630	19283838	5.81	7.04	A/G	17Semi
	A03	Bn-scaff_23813_1-p167977	21191617	-8.08	12.18	A/C	17Sp
	A03	Bn-A03-p26309336	24699271	4.87	5.51	A/G	17Sp
	A04	Bn-A04-p14687930	15158346	4.69-5.73	7.70-8.26	T/A	17Sp,18Sp
	A06	Bn-A06-p73924	60018	4.3	5.79	A/C	18Sp
	A06	Bn-A06-p8842980	8331823	-8.08	12.18	A/G	17Sp
	A06	Bn-A06-p16071214	17559622	-5.43	6.29	A/C	17Sp
	A06	Bn-A06-p22331680	21365690	4.3	5.08	T/G	18Sp
	A07	Bn-A07-p10430301	11624458	-8.08	12.18	T/C	17Sp
	A07	Bn-A02-p6233	12615849	5.23	5.74	T/G	17Sp
	A07	Bn-A02-p1198	12619482	-5.31	6.39	A/G	17Sp
	A07	Bn-A07-p12609078	14713090	-4.40	6.10	T/C	17Sp
	A07	Bn-A07-p14682292	16577235	-4.71	5.29	T/G	17Sp
	A07	Bn-A07-p20771568	22343999	-1.52	6.88	A/G	18Win
	A08	Bn-A08-p1088499	999828	5.61	6.77	C/G	17Sp
	A08	Bn-A05-p19362820	1946285	4.29	5.35	A/C	17Sp
	A08	Bn-scaff_16110_1-p214256	5357890	-8.08	12.18	T/G	17Sp
	A08	Bn-A08-p6722442	5662763	4.76	6.09	A/C	16Semi
	A08	Bn-A08-p10214814	8162114	2.68	5.17	T/C	16Semi
	A08	Bn-A08-p10215623	8163002	-1.66	5.03	A/C	17Semi
	A08	Bn-A08-p10329356	8285584	3.45	5.49	T/G	16Semi
	A08	Bn-A08-p10795996	8702202	2.7	6.13	T/C	16Semi
	A08	Bn-A08-p12781426	10473952	2.54	5.57	A/G	17Semi
	A08	Bn-A08-p12794893	10478870	-2.02- -1.88	6.75-7.66	T/C	17Semi,18Semi
	A08	Bn-A08-p12797532	10481492	-1.84- -1.65	5.33-6.49	A/C	17Semi,18Semi
	A08	Bn-A08-p12599446	10515601	-2.30- -2.09	7.20-8.71	T/C	17Semi,18Semi
	A08	Bn-A08-p12820786	10587675	-2.37- -2.33	8.80-8.86	A/C	17Semi,18Semi
	A08	Bn-A08-p13030362	10839190	-1.76	5.84	A/C	17Semi
	A08	Bn-A08-p13036508	10848584	-1.65- -1.43	6.12	T/C	17Semi,18Semi
	A08	Bn-A08-p13289070	11057222	1.82	5.55	A/G	16Semi
	A08	Bn-A08-p13327070	11074343	-1.30	5.35	A/G	17Semi
	A08	Bn-A08-p14351709	12051686	-8.08	12.18	T/G	17Sp
	A08	Bn-A08-p14447288	12146535	-8.08	12.18	T/G	17Sp
	A08	Bn-A08-p15448484	13018991	-8.08	12.18	A/G	17Sp
	A08	Bn-A08-p15740524	13242507	-8.08	12.18	A/G	17Sp
	A08	Bn-A08-p15802943	13299986	-2.47	8.35	T/C	18Win
	A08	Bn-A08-p16028375	13488657	-1.45	5.03	A/G	18Win
	A08	Bn-A08-p19217869	16557153	-5.63	6.22	T/G	17Sp
	A09	Bn-scaff_16361_1-p2978691	27568994	4.67	6.14	A/C	18Sp
	A09	Bn-A09-p36112515	33233968	-5.98	7.01	T/C	16Sp
	A10	Bn-A10-p749870	2696511	-5.97	6.78	A/G	16Sp
	A10	Bn-A10-p10717595	12083186	-5.63	6.22	T/C	17Sp
	A10	Bn-A10-p12857310	12902317	-8.08	12.18	T/G	17Sp
	A10	Bn-A10-p14092948	14089594	-5.02	5.45	T/C	17Sp
	A10	Bn-A10-p14179334	14175178	-8.81	15.95	T/C	17Sp
	A10	Bn-A10-p16837056	16640509	-5.97	6.78	A/T	16Sp
	C01	Bn-scaff_19193_1-p927967	5409405	3.53	5.25	A/G	18Sp
	C01	Bn-A01-p15043967	22253865	-4.42	7.58	A/C	16Win
	C01	Bn-A03-p11765203	32558894	3.79	6.22	A/T	18Sp
	C01	Bn-A08-p9268915	32559113	4	7.22	T/G	18Sp
	C01	Bn-scaff_21015_1-p34786	32559311	3.97	5.71	A/G	18Sp
	C03	Bn-scaff_17440_1-p318768	48148026	-6.37	7.72	T/C	17Sp
	C03	Bn-scaff_16394_2-p1431681	49774549	5.29	7.15	T/C	17Sp
	C03	Bn-scaff_17457_1-p493971	53921047	-1.87	5.35	T/C	18Win
	C03	Bn-scaff_15794_3-p165426	55436898	3.09	5.62	T/C	16Semi
	C03	Bn-scaff_15794_3-p164881	55438616	3.00	5.76	A/G	16Semi
	C03	Bn-scaff_15794_3-p164492	55439004	3.09	5.62	A/G	16Semi
	C03	Bn-scaff_15794_3-p164289	55439215	3.09	5.62	T/C	16Semi
	C03	Bn-scaff_15794_3-p154754	55441236	3.00	5.76	T/C	16Semi
	C03	Bn-scaff_15794_3-p154541	55441422	3.09	5.62	T/G	16Semi
	C03	Bn-scaff_15794_3-p154030	55441933	3.00	5.76	T/C	16Semi
	C03	Bn-scaff_15794_3-p34099	55541518	2.84	5.37	T/C	16Semi
	C03	Bn-scaff_15794_3-p33912	55541704	3.09	5.62	T/G	16Semi
	C03	Bn-scaff_15794_3-p33848	55541768	3.09	5.62	A/G	16Semi
	C03	Bn-scaff_15794_3-p33647	55541956	3.09	5.62	A/G	16Semi
	C03	Bn-scaff_15794_3-p32373	55543405	3.09	5.62	T/C	16Semi
	C03	Bn-scaff_15794_3-p32092	55543546	2.66	5.16	T/C	16Semi
	C03	Bn-scaff_15794_3-p29807	55549749	3.09	5.62	A/C	16Semi
	C03	Bn-scaff_15794_3-p29784	55549752	3.09	5.62	A/C	16Semi
	C03	Bn-scaff_15794_3-p75109	55706690	3.00	5.76	A/C	16Semi
	C03	Bn-scaff_15794_3-p75392	55706973	3.09	5.62	A/G	16Semi
	C03	Bn-scaff_15794_3-p84106	55711458	2.84	5.37	T/C	16Semi
	C03	Bn-scaff_15794_3-p84885	55712231	3.09	5.62	T/C	16Semi
	C03	Bn-scaff_15794_3-p89166	55716440	2.81	5.07	A/C	16Semi
	C03	Bn-scaff_15794_3-p89881	55717233	3.09	5.62	T/C	16Semi
	C03	Bn-scaff_15794_3-p89999	55717350	2.75	5.99	T/C	16Semi
	C03	Bn-scaff_15794_3-p108033	55728615	4.05	7.06	T/G	16Semi
	C03	Bn-scaff_15794_3-p137832	55738317	3.09	5.62	T/C	16Semi
	C04	Bn-scaff_16534_1-p399693	2953815	5.28	7.15	T/C	18Sp
	C04	Bn-scaff_15908_1-p60961	5261325	-8.11	9.90	T/C	16Sp
	C04	Bn-scaff_16565_1-p1266435	14319113	-6.37	7.72	A/G	17Sp
	C04	Bn-scaff_16394_1-p1122306	32475759	-6.37	7.72	T/G	17Sp
	C04	Bn-scaff_16888_1-p1347380	45497825	-4.42	7.58	T/C	16Win
	C04	Bn-scaff_16888_1-p1347381	45497826	-3.67	5.48	T/G	16Win
	C05	Bn-scaff_16414_1-p874497	1080366	2.32	5.59	T/G	18Sp
	C05	Bn-scaff_16414_1-p863783	1091070	5.54	6.60	T/A	17Sp
	C05	Bn-A06-p8221017	9624871	5.28	7.15	A/C	18Sp
	C05	Bn-scaff_20250_2-p177053	19322537	-6.37	7.72	T/G	17Sp
	C06	Bn-scaff_18549_1-p600676	926911	5.16	8.07	C/G	18Sp
	C06	Bn-scaff_15763_1-p548135	20121306	-5.38	7.05	T/C	17Sp
	C07	Bn-scaff_16130_1-p1410347	29013705	4.2	5.38	A/C	18Sp
	C07	Bn-scaff_15705_1-p2274493	35279701	-1.77	5.25	A/G	18Win
	C07	Bn-scaff_15705_1-p2279820	35285036	-1.75	5.07	T/C	18Win
	C08	Bn-scaff_16174_1-p1505515	23749865	-8.11	9.90	A/G	16Sp
	C08	Bn-scaff_16361_1-p1943766	29487844	-8.11	9.90	T/G	16Sp
	C09	Bn-scaff_18944_1-p566719	19915878	-8.08	12.18	A/G	17Sp
	C09	Bn-scaff_16569_1-p650486	21774443	-4.90	6.34	T/C	16Sp
	C09	Bn-scaff_16456_1-p453404	35037965	5.28	7.15	T/C	18Sp
	C09	Bn-scaff_16456_1-p415818	35068732	4.75	7.65	T/C	18Sp
	C09	Bn-scaff_16456_1-p406379	35075252	5.28	7.15	T/G	18Sp
C18:3	A01	Bn-A01-p483495	73409	-0.68	10.95	T/C	18Semi
	A01	Bn-A01-p1001022	618660	-0.6	8.78	A/G	18Semi
	A01	Bn-A01-p1089109	687337	-0.64	9.84	T/G	18Semi
	A01	Bn-A01-p1152369	756054	-0.5	5.71	A/G	18Semi
	A01	Bn-A01-p1373239	974343	0.47	5.78	A/G	18Semi
	A01	Bn-A01-p2882270	2386260	-0.63	10.03	A/C	18Semi
	A01	Bn-A01-p3097105	2801302	0.63	9.57	A/G	18Semi
	A01	Bn-A01-p4303527	3984265	0.5	5.27	A/C	18Semi
	A01	Bn-A01-p4651746	4273528	-0.5	6.69	A/G	18Semi
	A01	Bn-A01-p5243181	4826424	-0.75	13.86	T/C	18Semi
	A01	Bn-A01-p7559946	6900566	-1.81	5.42	T/C	17Semi
	A01	Bn-A01-p9469933	8103592	-0.65	10.52	A/C	18Semi
	A01	Bn-A01-p9619932	8232639	0.77	15.18	A/G	18Semi
	A01	Bn-A01-p11233207	9297618	0.44	5.37	T/G	18Semi
	A01	Bn-A01-p11284636	9362727	0.51	7.21	A/G	18Semi
	A01	Bn-A01-p12145148	10351941	1.12	5.81	T/C	18Sp
	A01	Bn-A01-p12580778	10789583	-0.46	5.39	A/G	18Semi
	A01	Bn-A01-p15090383	12600997	-0.65	10.52	A/C	18Semi
	A01	Bn-A01-p19650666	16469623	1.19	7.54	T/G	18Sp
	A01	Bn-A01-p22768523	18948284	1.78	7.7	T/C	16Sp
	A01	Bn-A01-p23972100	20008054	0.46	5.65	T/C	18Semi
	A01	Bn-A01-p24416660	20214741	-0.63	9.8	T/C	18Semi
	A01	Bn-A01-p24431478	20229832	0.73	13.03	A/G	18Semi
	A01	Bn-A01-p24507466	20311699	-0.5	6.1	T/C	18Semi
	A01	Bn-Scaffold000164-p192232	20662548	0.6	8.92	T/C	18Semi
	A01	Bn-A01-p26366791	20889210	-0.7	12.05	T/C	18Semi
	A01	Bn-A01-p27117954	21192967	-0.48	5.75	T/C	18Semi
	A02	Bn-scaff_15714_1-p1537912	929885	0.71	12.25	A/G	18Semi
	A02	Bn-A02-p3640490	1075724	-0.54	7.64	T/A	18Semi
	A02	Bn-A02-p3821944	1242377	0.54	7.2	T/C	18Semi
	A02	Bn-A02-p4220181	1597355	-2.21	5.80	A/C	17Win
	A02	Bn-A02-p5485978	2601981	-0.64	10.15	A/G	18Semi
	A02	Bn-A02-p6156818	3319912	-0.75	13.86	T/C	18Semi
	A02	Bn-A02-p6164030	3322587	-0.45	5.52	T/C	18Semi
	A02	Bn-A02-p9346140	6157566	-0.55	7.79	T/C	18Semi
	A02	Bn-A02-p10806477	7631300	-0.53	7.19	A/G	18Semi
	A02	Bn-A02-p13822105	10467919	1.35	8.87	T/C	18Sp
	A02	Bn-A01-p20784377	16816332	1.3	8.82	A/C	18Sp
	A02	Bn-A02-p18101171	17261238	-0.8	15.65	T/C	18Semi
	A03	Bn-A03-p2412263	1971696	-0.55	5.71	T/C	18Semi
	A03	Bn-A03-p2469223	2007176	0.52	6.49	A/G	18Semi
	A03	Bn-A03-p3692048	3249676	-0.47	6.22	T/G	18Semi
	A03	Bn-A10-p14971063	4198025	-0.55	7.75	A/G	18Semi
	A03	Bn-A03-p7011746	6295737	-0.65	10.52	A/C	18Semi
	A03	Bn-A03-p7823490	7115515	0.61	8.98	T/G	18Semi
	A03	Bn-A03-p8620584	7909907	1.3	8.82	T/C	18Sp
	A03	Bn-A03-p10002791	9197325	0.69	11.69	A/G	18Semi
	A03	Bn-A03-p10296969	9468697	-0.46	5.46	A/C	18Semi
	A03	Bn-A07-p6068639	12870570	-0.55	7.6	T/G	18Semi
	A03	Bn-A03-p14262103	13450480	0.51	6.56	A/G	18Semi
	A03	Bn-A03-p14839497	13995703	0.67	10.55	A/G	18Semi
	A03	Bn-scaff_17521_1-p1054284	14409313	0.54	7.12	T/C	18Semi
	A03	Bn-A03-p16162908	15257414	-1.49	13.69	A/G	18Sp
	A03	Bn-A03-p16565487	15689355	-1.95	7.17	T/G	17Semi
	A03	Bn-A03-p16607714	15721885	-1.95	7.17	A/C	17Semi
	A03	Bn-A03-p16613382	15727576	-0.65-1.30	8.82-10.52	A/G	18Sp,18Semi
	A03	Bn-A03-p16742011	15873547	-0.64	10.46	T/C	18Semi
	A03	Bn-scaff_17298_1-p1173360	15888160	-0.47	5.5	T/C	18Semi
	A03	Bn-A03-p16811562	15967291	-0.65	10.94	T/C	18Semi
	A03	Bn-A03-p16852209	16012379	-1.81	5.42	A/C	17Semi
	A03	Bn-A03-p18706654	17732691	1.43	10.53	A/C	18Sp
	A03	Bn-A03-p20350690	19217415	0.53	7.66	A/G	18Semi
	A03	Bn-A03-p21964085	20761366	1.06	6.03	A/C	18Sp
	A03	Bn-A03-p23609377	22177215	-0.57	8.3	T/G	18Semi
	A03	Bn-A03-p26284882	24676373	-1.03	6.18	T/C	18Sp
	A03	Bn-A03-p27337536	25579664	0.45	5.43	A/G	18Semi
	A04	Bn-A04-p1244890	993694	0.45	5.43	A/G	18Semi
	A04	Bn-A04-p1865434	1588505	-1.04	5.73	A/G	18Sp
	A04	Bn-A04-p2037077	1944266	0.45	5.43	T/C	18Semi
	A04	Bn-A04-p2593658	2299047	1.46	10.96	T/C	18Sp
	A04	Bn-A04-p2765547	2466391	0.77	15.18	A/G	18Semi
	A04	Bn-A04-p6632126	7864819	-0.53	6.87	A/G	18Semi
	A04	Bn-A04-p7077586	8348734	-1	5.28	A/C	18Sp
	A04	Bn-A04-p7629926	8963652	1.3	8.82	A/G	18Sp
	A04	Bn-A04-p10434805	11594668	-0.99	5.07	T/C	18Sp
	A04	Bn-A04-p10841936	12001771	0.5	6.01	T/C	18Semi
	A04	Bn-A04-p11888044	12910863	0.49	5.51	T/C	18Semi
	A04	Bn-A04-p15296217	15753636	0.54	7.1	T/G	18Semi
	A04	Bn-A04-p16558888	16716888	0.68	11.33	A/C	18Semi
	A04	Bn-A04-p16563543	16718050	0.44	5.38	T/C	18Semi
	A04	Bn-scaff_20270_1-p639601	17745339	0.49	6.2	T/A	18Semi
	A04	Bn-A04-p18167535	18251466	-1.6	13.3	T/G	18Sp
	A05	Bn-A05-p461633	571525	0.51	6.67	A/G	18Semi
	A05	Bn-A05-p2416806	2535586	-1.81	5.42	T/G	17Semi
	A05	Bn-A05-p5133417	4948041	-0.56	7.96	T/C	18Semi
	A05	Bn-scaff_23907_1-p547717	4960670	-0.56	7.96	G/C	18Semi
	A05	Bn-A05-p5566193	5320973	-0.56	7.96	A/G	18Semi
	A05	Bn-A05-p5575695	5325971	-0.45	5.27	A/C	18Semi
	A05	Bn-A05-p5586839	5333850	-0.73	13.01	T/C	18Semi
	A05	Bn-A05-p5588271	5335251	-0.45	5.27	T/G	18Semi
	A05	Bn-A05-p5595403	5343604	-0.56	7.96	A/C	18Semi
	A05	Bn-A05-p7062575	6511372	-0.65	10.2	T/C	18Semi
	A05	Bn-A05-p10939740	9532568	-0.65	10.52	A/G	18Semi
	A05	Bn-A05-p11297100	9614123	-0.62	9.19	A/G	18Semi
	A05	Bn-Scaffold000324-p17294	10726527	0.74	12.67	A/C	18Semi
	A05	Bn-A05-p11990369	10799861	-1.12	5.71	T/G	18Sp
	A05	Bn-A05-p14206169	16030064	0.76	14.04	A/G	18Semi
	A05	Bn-A05-p14206731	16030626	0.76	14.04	A/C	18Semi
	A05	Bn-A05-p14207371	16031267	0.68	10.81	T/C	18Semi
	A05	Bn-A05-p14207788	16031683	0.76	14.04	T/G	18Semi
	A05	Bn-A05-p19650213	17869974	-0.56	8.1	A/G	18Semi
	A05	Bn-A05-p19650965	17870760	-0.66	10.99	T/C	18Semi
	A05	Bn-A05-p19909249	18136717	1.2	7.44	T/G	18Sp
	A05	Bn-A05-p21313618	19474804	1.28	8.33	T/C	18Sp
	A05	Bn-A05-p21698558	19885811	0.53	7.22	T/G	18Semi
	A05	Bn-A02-p23280869	21443919	-1.81	5.42	C/G	17Semi
	A05	Bn-A02-p23280472	21444313	-1.81	5.42	T/G	17Semi
	A06	Bn-A06-p73924	60018	1.75	15.95	A/C	18Sp
	A06	Bn-A06-p853722	1082917	-0.49	5.2	T/C	18Semi
	A06	Bn-A06-p5535537	5007675	0.49	6.51	G/C	18Semi
	A06	Bn-A06-p7279909	6758391	-0.5	6.06	A/G	18Semi
	A06	Bn-A06-p7771695	7398901	1.09	6.04	G/C	18Sp
	A06	Bn-A01-p24107515	11576454	-1.81	5.42	A/G	17Semi
	A06	Bn-Scaffold001298-p970	17870545	-2.25	6.1	T/C	18Win
	A06	Bn-A06-p16847229	18245633	-0.57	8.3	T/C	18Semi
	A06	Bn-A06-p17430491	18823782	0.74	13.03	T/C	18Semi
	A06	Bn-A06-p18394892	19770186	0.45	5.61	A/G	18Semi
	A06	Bn-A06-p21163950	20526802	1.3	8.82	A/C	18Sp
	A06	Bn-A06-p22331680	21365690	-1.81	5.42	T/G	17Semi
	A06	Bn-A06-p23586019	22556612	1.61	13.54	T/C	18Sp
	A06	Bn-A06-p23748804	22726962	-0.57	8.3	T/G	18Semi
	A06	Bn-A06-p24257262	23254228	-0.51	6.33	T/C	18Semi
	A07	Bn-A07-p955599	1113454	-0.62	8.96	T/C	18Semi
	A07	Bn-A09-p18275618	1347181	0.72	13.44	T/G	18Semi
	A07	Bn-A09-p18289551	1364901	0.72	13.44	A/G	18Semi
	A07	Bn-A07-p2425818	3510396	-0.51	6.63	T/C	18Semi
	A07	Bn-A07-p3482570	5474819	0.49	6.13	T/C	18Semi
	A07	Bn-A07-p3747912	5708071	0.61	8.29	T/G	18Semi
	A07	Bn-A07-p3796068	5753518	0.61	8.02	A/G	18Semi
	A07	Bn-A07-p3856921	5809629	-0.66	10.75	A/C	18Semi
	A07	Bn-A07-p3915443	5844662	0.48	5.62	T/G	18Semi
	A07	Bn-A07-p4162513	6085470	0.43	5.24	A/C	18Semi
	A07	Bn-A07-p4173116	6093106	0.72	12.16	A/G	18Semi
	A07	Bn-A07-p4191546	6111512	0.66	9.99	T/G	18Semi
	A07	Bn-A07-p4364075	6312024	0.52	7.03	A/G	18Semi
	A07	Bn-A07-p5211320	7061895	0.66	10.62	A/G	18Semi
	A07	Bn-A07-p5398751	7245160	0.52	6.8	T/C	18Semi
	A07	Bn-A07-p5794504	7733517	0.46	5.25	T/G	18Semi
	A07	Bn-A07-p8334245	9781240	0.57	8.07	A/C	18Semi
	A07	Bn-A07-p10473511	11655129	-1.24	5.83	A/G	18Sp
	A07	Bn-Scaffold012966-p76	12552424	0.76	14.04	T/G	18Semi
	A07	Bn-A02-p266070	12889903	-0.45	5.17	A/G	18Semi
	A07	Bn-A07-p13148032	15228347	-0.48	5.94	A/G	18Semi
	A07	Bn-A07-p13665031	15657655	0.45	5.43	A/G	18Semi
	A07	Bn-A07-p13931176	15862877	0.55	7.95	A/G	18Semi
	A07	Bn-A07-p14870055	16738100	-0.6	8.63	A/G	18Semi
	A07	Bn-A07-p14895675	16764559	-0.67	11	A/G	18Semi
	A07	Bn-A07-p15411766	17324786	-0.55	7.33	T/C	18Semi
	A07	Bn-A07-p15425959	17339084	-0.51	6.42	T/C	18Semi
	A07	Bn-A07-p15464739	17376089	-0.65	10.82	T/C	18Semi
	A07	Bn-A07-p16039345	17954917	0.51	6.61	T/G	18Semi
	A07	Bn-A07-p16050076	17964530	0.45	5.43	A/C	18Semi
	A07	Bn-A07-p16070816	17973924	0.56	7.92	T/C	18Semi
	A07	Bn-A07-p16079602	17982563	0.52	6.95	A/G	18Semi
	A07	Bn-A07-p16089710	17988762	0.57	7.92	A/G	18Semi
	A07	Bn-A07-p16095589	17996552	0.56	7.76	T/C	18Semi
	A07	Bn-A07-p16099690	18000654	0.51	6.54	T/C	18Semi
	A07	Bn-A07-p16101102	18002070	0.73	13.1	T/G	18Semi
	A07	Bn-A07-p16559043	18537611	0.58	8.38	T/C	18Semi
	A07	Bn-A07-p17382630	19282773	-1.81	5.42	A/G	17Semi
	A07	Bn-A07-p17388825	19287189	-1.81	5.42	A/G	17Semi
	A07	Bn-A07-p18115061	19989726	0.45	5.43	T/G	18Semi
	A07	Bn-scaff_19937_1-p20028	21340943	1.29	8.18	T/C	18Sp
	A07	Bn-A07-p22136602	23524106	-1.81	5.42	T/C	17Semi
	A08	Bn-A08-p2274232	1778991	-0.65	10.52	G/C	18Semi
	A08	Bn-scaff_17807_1-p294470	1860686	1.3	8.82	A/G	18Sp
	A08	Bn-A05-p19362820	1946285	1.06	5.84	A/C	18Sp
	A08	Bn-A08-p5051251	4254085	0.48	5.48	T/C	18Semi
	A08	Bn-Scaffold000512-p1602	4746996	1.45	5.59	T/G	16Sp
	A08	Bn-A08-p6298340	5350204	-1.81	5.42	T/C	17Semi
	A08	Bn-A08-p6828857	5776774	0.52	6.55	T/C	18Semi
	A08	Bn-A08-p10608550	8600170	1.34	5.42	A/C	18Win
	A08	Bn-A08-p15239790	12798553	0.49	6.43	A/G	18Semi
	A08	Bn-A08-p16638835	14094785	-1.21- -0.50	5.31-5.98	A/G	17Semi-18Semi
	A08	Bn-A05-p8206349	17620379	0.53	7.46	A/G	18Semi
	A08	Bn-A05-p8245454	17667610	2.68	8.73	T/G	18Win
	A09	Bn-A09-p1252014	1026489	-1.61	13.37	A/C	18Sp
	A09	Bn-A09-p2323366	1519271	0.76	14.04	A/G	18Semi
	A09	Bn-A09-p1721507	2213680	-0.59	8.74	T/C	18Semi
	A09	Bn-A09-p4838767	4747391	3.77	5.823	G/C	16Win
	A09	Bn-A09-p11498983	15186712	1.74	8.35	T/G	16Sp
	A09	Bn-A09-p19438042	16178987	1.66	7.98	T/C	16Sp
	A09	Bn-A09-p22953858	21326253	-0.49	6.14	T/G	18Semi
	A09	Bn-A09-p24113289	23069752	1.43	10.68	T/G	18Sp
	A09	Bn-A09-p27103683	25104078	1.3	8.82	T/G	18Sp
	A09	Bn-A09-p27108615	25108812	1.3	8.82	T/C	18Sp
	A09	Bn-A09-p27109839	25110047	1.3	8.82	T/C	18Sp
	A09	Bn-A09-p28602135	26507208	-1.98- -0.98	5.61-7.16	T/G	17Semi,18Sp
	A09	Bn-A09-p31231616	28912706	1.3	8.74	A/G	18Sp
	A09	Bn-A09-p31492693	29184323	0.54	6.13	A/G	18Semi
	A09	Bn-scaff_16197_1-p1039692	29638853	0.76	14.04	A/G	18Semi
	A09	Bn-A09-p32104974	29995505	-0.69	11.42	T/A	18Semi
	A09	Bn-scaff_16445_1-p723609	31892164	1.04	5.1	A/C	18Sp
	A10	Bn-A10-p3909275	913569	-2.21-0.97	5.8007-5.17	T/C	17Win,18Sp
	A10	Bn-A10-p2240635	1592085	0.53	7.18	T/G	18Semi
	A10	Bn-A10-p749870	2696511	-2.25	13.5	A/G	16Sp
	A10	Bn-A10-p3669813	6723868	0.52	6.87	A/C	18Semi
	A10	Bn-A10-p7118112	8703408	-0.57	8.3	T/G	18Semi
	A10	Bn-A09-p29500865	9719806	0.77	14.56	G/C	18Semi
	A10	Bn-A10-p8963952	10368441	0.58	8.21	T/G	18Semi
	A10	Bn-A10-p8996669	10396211	-0.61	9.18	A/G	18Semi
	A10	Bn-A10-p9259792	10668183	-1.93	7.09	T/C	17Semi
	A10	Bn-A10-p9979372	11410972	-0.57	8.3	A/G	18Semi
	A10	Bn-A10-p10717595	12083186	0.45	5.43	T/C	18Semi
	A10	Bn-A10-p12996989	13029765	1.03	5.22	T/C	18Sp
	A10	Bn-A10-p14327285	14264189	-0.55	7.55	A/G	18Semi
	A10	Bn-A10-p15237475	16250125	0.51	6.26	T/C	18Semi
	A10	Bn-A10-p16672063	16463233	-2.04	6.14	T/G	18Win
	A10	Bn-A10-p16837056	16640509	-2.25	13.5	A/T	16Sp
	C01	Bn-A01-p2292174	2644796	-0.74	13.19	A/G	18Semi
	C01	Bn-scaff_15838_5-p850445	3684748	-2.48	14.95	T/C	16Sp
	C01	Bn-scaff_15838_5-p1112065	3957081	-1.81- -1.49	5.42-5.95	T/C	16Sp,17Semi
	C01	Bn-scaff_15838_5-p1182961	4016436	-2.48	14.95	A/G	16Sp
	C01	Bn-scaff_19193_1-p1288594	5010260	0.59	9.02	T/G	18Semi
	C01	Bn-scaff_19193_1-p1191929	5125280	0.59	9.02	A/G	18Semi
	C01	Bn-scaff_19193_1-p1189479	5127659	0.48	5.95	T/C	18Semi
	C01	Bn-scaff_19193_1-p875889	5468648	0.48	6.06	T/C	18Semi
	C01	Bn-scaff_19193_1-p832198	5495802	0.48	6.06	A/G	18Semi
	C01	Bn-scaff_21313_1-p2300	5769486	1.08	5.33	T/C	18Sp
	C01	Bn-scaff_19193_1-p527597	5772854	1.08	5.33	T/C	18Sp
	C01	Bn-scaff_17827_1-p789222	7610642	-1.08	5.91	A/C	18Sp
	C01	Bn-scaff_20675_1-p149133	9611053	-0.53	7.4	T/C	18Semi
	C01	Bn-scaff_15803_1-p802390	14813740	-2.21	5.80	T/C	17Win
	C01	Bn-scaff_15803_1-p558476	15086843	-2.21	5.80	T/C	17Win
	C01	Bn-scaff_22790_1-p179981	15855200	-1.04	5.64	A/G	18Sp
	C01	Bn-scaff_20250_1-p276340	16977385	-1.03	6.31	A/G	18Sp
	C01	Bn-scaff_16231_1-p734971	34697511	1.3	8.82	A/G	18Sp
	C02	Bn-scaff_20942_1-p607399	10624185	1.14	5.62	T/C	18Sp
	C02	Bn-scaff_16565_1-p1165273	12447827	-0.99	6.34	T/C	18Sp
	C02	Bn-scaff_27039_1-p545783	13977398	-0.99	5.93	T/G	18Sp
	C02	Bn-scaff_17077_1-p558281	18006866	1.2	8.17	T/C	18Sp
	C02	Bn-scaff_27485_1-p7330	18237676	1.16	7.55	A/G	18Sp
	C02	Bn-scaff_18675_1-p230717	22324250	0.77	15.18	T/C	18Semi
	C02	Bn-scaff_18675_1-p95631	22368946	0.77	15.18	T/G	18Semi
	C02	Bn-scaff_18675_1-p85245	22383446	0.77	15.18	A/C	18Semi
	C02	Bn-scaff_18675_1-p82128	22385008	0.77	15.18	A/G	18Semi
	C02	Bn-scaff_16300_1-p1266301	22532466	0.77	15.18	T/C	18Semi
	C02	Bn-scaff_16300_1-p1260807	22537891	0.77	15.18	T/C	18Semi
	C02	Bn-scaff_16300_1-p1248733	22551393	0.77	15.18	T/C	18Semi
	C02	Bn-scaff_16300_1-p1234612	22559876	0.77	15.18	T/C	18Semi
	C02	Bn-scaff_18507_1-p446042	23456112	0.55	7.65	T/G	18Semi
	C02	Bn-scaff_17067_1-p623138	28049979	-1.45-0.45	5.43-10.82	T/C	18Sp,18Semi
	C02	Bn-scaff_16328_1-p910998	28654875	0.45	5.43	A/C	18Semi
	C02	Bn-scaff_17067_1-p909031	30626846	0.45	5.43	T/C	18Semi
	C02	Bn-scaff_17067_1-p990270	30714313	0.45	5.43	A/G	18Semi
	C02	Bn-scaff_18412_1-p28374	30740663	0.45	5.43	T/C	18Semi
	C02	Bn-scaff_18360_1-p151873	35920058	-0.66	10.75	T/G	18Semi
	C02	Bn-scaff_17177_1-p385429	44839702	-1.81	5.42	G/C	17Semi
	C03	Bn-scaff_16614_1-p1069967	1020831	0.51	6.24	A/C	18Semi
	C03	Bn-scaff_16614_1-p731075	1373726	0.49	5.97	A/C	18Semi
	C03	Bn-scaff_16614_1-p725210	1377615	0.49	5.97	T/G	18Semi
	C03	Bn-scaff_16614_1-p721297	1381524	0.49	5.97	A/C	18Semi
	C03	Bn-A03-p3571622	4255266	0.49	5.52	T/C	18Semi
	C03	Bn-scaff_22728_1-p1012244	5670223	0.49	6.13	A/G	18Semi
	C03	Bn-A03-p10218040	13244375	0.49	5.51	G/C	18Semi
	C03	Bn-scaff_20646_1-p675506	17382451	1.3	8.82	A/G	18Sp
	C03	Bn-scaff_22067_1-p70907	20624384	-1.54	6.06	A/C	16Sp
	C03	Bn-scaff_17298_1-p779577	23106957	-2.21	5.80	A/G	17Win
	C03	Bn-scaff_17298_1-p1412259	23516558	0.43	5.26	T/C	18Semi
	C03	Bn-scaff_17298_1-p1413290	23517589	0.43	5.26	T/C	18Semi
	C03	Bn-scaff_17298_1-p1471882	23560777	0.63	9.73	A/G	18Semi
	C03	Bn-scaff_23350_1-p16694	24244280	0.49	6.71	T/C	18Semi
	C03	Bn-scaff_23350_1-p830500	25005545	-0.46	5.58	A/G	18Semi
	C03	Bn-scaff_26505_1-p5590	28729268	0.78	14.88	T/G	18Semi
	C03	Bn-scaff_18917_1-p946071	28790958	0.5	6.24	A/G	18Semi
	C03	Bn-scaff_19186_1-p824933	41958742	0.72	12.6	T/C	18Semi
	C03	Bn-scaff_21867_1-p30532	46272462	3.77	5.823	T/G	16Win
	C03	Bn-scaff_23407_1-p141430	46436675	3.77	5.823	A/G	16Win
	C03	Bn-scaff_18849_1-p143695	47243582	-0.72	12.48	T/C	18Semi
	C03	Bn-scaff_17440_1-p318768	48148026	1.78	7.7	T/C	16Sp
	C04	Bn-scaff_28382_1-p44654	2000421	0.76	14.04	T/C	18Semi
	C04	Bn-scaff_23699_1-p435199	10712194	-1.81	5.42	A/G	17Semi
	C04	Bn-scaff_23699_1-p435151	10712365	-1.81	5.42	T/G	17Semi
	C04	Bn-scaff_23699_1-p420652	10726883	-1.81	5.42	A/G	17Semi
	C04	Bn-scaff_23699_1-p400514	10751159	-1.81	5.42	T/C	17Semi
	C04	Bn-scaff_23699_1-p342630	10807109	-1.81	5.42	T/G	17Semi
	C04	Bn-scaff_23699_1-p297000	10858082	-1.81	5.42	A/G	17Semi
	C04	Bn-scaff_23699_1-p296320	10858762	-1.81	5.42	A/G	17Semi
	C04	Bn-scaff_16564_1-p236601	11168988	0.63	9.57	T/C	18Semi
	C04	Bn-scaff_17592_1-p869743	13024212	-1.81	5.42	T/C	17Semi
	C04	Bn-scaff_16565_1-p1266435	14319113	1.78	7.7	A/G	16Sp
	C04	Bn-scaff_19253_1-p387544	15427632	0.77	15.18	T/C	18Semi
	C04	Bn-scaff_16511_1-p864235	16428717	0.53	6.54	A/C	18Semi
	C04	Bn-scaff_15779_1-p94004	30153296	-0.74	13.19	G/C	18Semi
	C04	Bn-scaff_16394_1-p623306	31861635	0.6	8.72	A/G	18Semi
	C04	Bn-scaff_16394_1-p1122306	32475759	1.78	7.7	T/G	16Sp
	C04	Bn-scaff_16394_1-p1521626	32960035	0.62	9.71	T/G	18Semi
	C04	Bn-scaff_16876_1-p8795	34768778	-2.76	12.73	C/G	17Semi
	C04	Bn-scaff_16517_1-p561513	42340274	-0.45	5.17	T/G	18Semi
	C04	Bn-scaff_15585_1-p16863	43882274	1.08	6.51	T/C	18Sp
	C04	Bn-scaff_15585_1-p17979	43883196	1.08	6.51	A/C	18Sp
	C04	Bn-scaff_15585_1-p18317	43883534	1.08	6.51	T/C	18Sp
	C04	Bn-scaff_15585_1-p25747	43894730	1.02	5.8	T/C	18Sp
	C04	Bn-scaff_16139_1-p785412	43939995	1.08	6.51	A/C	18Sp
	C04	Bn-scaff_15585_1-p291968	44230930	-0.57	8.3	T/G	18Semi
	C04	Bn-scaff_15585_1-p368364	44297353	-0.57	8.3	A/C	18Semi
	C04	Bn-scaff_15585_1-p368724	44297772	-0.57	8.3	T/C	18Semi
	C04	Bn-scaff_15585_1-p1060833	44471888	0.71	12.25	A/G	18Semi
	C04	Bn-scaff_20804_1-p3926	44775901	-0.57	8.3	A/C	18Semi
	C04	Bn-scaff_16888_1-p45860	44839790	-0.57	8.3	T/C	18Semi
	C04	Bn-scaff_16888_1-p1347380	45497825	-1.81	5.42	T/C	17Semi
	C04	Bn-scaff_16888_1-p1347381	45497826	-1.81	5.42	T/G	17Semi
	C04	Bn-scaff_20270_1-p456204	46573030	-1.81	5.42	A/T	17Semi
	C04	Bn-scaff_18903_1-p127936	47289489	0.71	12.25	A/G	18Semi
	C04	Bn-scaff_18903_1-p497762	47649170	0.71	12.25	T/C	18Semi
	C05	Bn-scaff_20901_1-p1719394	2295884	-1.39	5.68	A/G	17Semi
	C05	Bn-scaff_20901_1-p403764	3636261	0.43	5.2	A/G	18Semi
	C05	Bn-Scaffold000324-p108	8698912	-1.17	7.29	T/C	18Sp
	C05	Bn-scaff_25705_1-p102800	9439279	-2.25	6.1	T/C	18Win
	C05	Bn-scaff_16268_1-p9957	13299325	0.46	5.63	T/C	18Semi
	C05	Bn-scaff_18338_1-p984141	13773225	-0.77	13.89	T/A	18Semi
	C05	Bn-scaff_20250_2-p177053	19322537	1.78	7.7	T/G	16Sp
	C05	Bn-scaff_16454_1-p884909	21537168	-1.34	9.06	A/G	18Sp
	C05	Bn-scaff_21124_1-p212889	37495084	-0.77	14.2	T/C	18Semi
	C05	Bn-scaff_21369_1-p456007	38489939	0.54	6.92	T/G	18Semi
	C05	Bn-scaff_17441_1-p348811	39483593	0.72	12.6	T/G	18Semi
	C05	Bn-scaff_17441_1-p349537	39484355	0.73	12.9	C/G	18Semi
	C05	Bn-scaff_17441_1-p1197771	40267266	0.47	5.94	T/C	18Semi
	C05	Bn-scaff_20219_1-p290323	40943481	0.76	14.04	A/G	18Semi
	C05	Bn-scaff_15856_1-p78904	42864349	-0.74	13.44	A/C	18Semi
	C05	Bn-scaff_20809_1-p74433	43100840	0.66	10.59	A/G	18Semi
	C06	Bn-scaff_18140_1-p599818	1939047	0.48	6.43	T/C	18Semi
	C06	Bn-scaff_18140_1-p498966	2202933	0.44	5.3	A/G	18Semi
	C06	Bn-scaff_21369_1-p871257	6370481	1.06	6.04	T/C	18Sp
	C06	Bn-scaff_17984_1-p641066	7936806	0.45	5.46	T/C	18Semi
	C06	Bn-scaff_17454_1-p225095	8428072	0.52	7.31	A/G	18Semi
	C06	Bn-scaff_16297_1-p99269	8884798	0.45	5.46	A/C	18Semi
	C06	Bn-scaff_17984_1-p517694	9357801	0.45	5.46	T/C	18Semi
	C06	Bn-scaff_17984_1-p552448	9385931	0.52	7.31	A/G	18Semi
	C06	Bn-scaff_17984_1-p910170	9730421	0.52	6.88	A/G	18Semi
	C06	Bn-scaff_17984_1-p910461	9730712	0.45	5.46	T/C	18Semi
	C06	Bn-scaff_17984_1-p910881	9731132	0.45	5.46	T/G	18Semi
	C06	Bn-scaff_17984_1-p1076812	9856925	0.52	7.31	A/C	18Semi
	C06	Bn-scaff_18439_1-p706567	12826410	0.49	6.03	T/C	18Semi
	C06	Bn-scaff_15818_1-p2921633	22333358	-0.63	10.64	T/G	18Semi
	C06	Bn-scaff_18439_1-p208451	24118072	-0.55	7.66	A/G	18Semi
	C06	Bn-scaff_18360_1-p134193	25424621	0.46	5.77	T/C	18Semi
	C06	Bn-scaff_16865_1-p112306	25672614	0.79	15.26	T/C	18Semi
	C06	Bn-scaff_15892_1-p310757	26222243	0.52	7.02	T/C	18Semi
	C06	Bn-scaff_15892_1-p311434	26222921	0.78	14.88	A/G	18Semi
	C06	Bn-scaff_15892_1-p326893	26238148	0.5	6.45	A/G	18Semi
	C06	Bn-scaff_15892_1-p365424	26260306	0.5	6.45	T/G	18Semi
	C06	Bn-scaff_15892_1-p1170714	27032083	-0.46	5.33	T/G	18Semi
	C06	Bn-scaff_15892_1-p1523011	27368587	0.63	9.19	T/C	18Semi
	C06	Bn-scaff_15743_1-p645373	27856081	0.62	8.87	T/G	18Semi
	C06	Bn-scaff_23821_1-p22581	29992019	0.79	15.26	T/C	18Semi
	C06	Bn-scaff_23957_1-p175042	30652290	-1.75	7.84	T/C	16Sp
	C06	Bn-scaff_20294_1-p421721	33540207	-0.57	8.3	A/G	18Semi
	C06	Bn-scaff_17799_1-p859838	35732418	0.47	5.74	A/G	18Semi
	C06	Bn-scaff_17799_1-p853567	35737875	0.47	5.74	A/G	18Semi
	C06	Bn-scaff_17799_1-p459314	36177380	-0.73	12.81	A/G	18Semi
	C06	Bn-scaff_17799_1-p458187	36178549	-0.52	7.21	T/C	18Semi
	C06	Bn-scaff_17799_1-p401453	36233380	0.46	5.62	T/C	18Semi
	C07	Bn-scaff_16721_1-p2118530	5329639	0.48	5.17	T/C	18Semi
	C07	Bn-scaff_22441_1-p129498	7149956	-1.08	5.53	T/G	18Sp
	C07	Bn-scaff_22310_1-p310994	7976129	0.57	7.6	T/C	18Semi
	C07	Bn-scaff_22310_1-p321188	7983992	0.58	8.36	T/C	18Semi
	C07	Bn-scaff_15712_10-p1083738	8680134	-1.16	6.81	A/C	18Sp
	C07	Bn-A10-p12603365	8855561	0.5	6.48	T/C	18Semi
	C07	Bn-scaff_17461_1-p1193733	9960935	-1.81	5.42	A/G	17Semi
	C07	Bn-scaff_16200_1-p340573	11379195	0.49	6.08	A/C	18Semi
	C07	Bn-scaff_16200_1-p526204	11601958	0.47	5.79	T/G	18Semi
	C07	Bn-scaff_16450_1-p15270	18476957	-1.81	5.42	A/G	17Semi
	C07	Bn-scaff_19106_1-p463047	18601376	-0.63	10.61	A/G	18Semi
	C07	Bn-scaff_18501_1-p560593	20863720	-0.52	6.89	A/G	18Semi
	C07	Bn-scaff_18202_1-p1568783	22250253	-1.98	7.16	A/C	17Semi
	C07	Bn-scaff_18202_1-p871410	22787445	1.14	6.89	A/G	18Sp
	C07	Bn-scaff_18202_1-p870832	22788022	1.14	6.89	T/C	18Sp
	C07	Bn-scaff_18202_1-p870665	22788189	1.14	6.89	T/C	18Sp
	C07	Bn-scaff_16130_1-p1410347	29013705	1.01	5.55	A/C	18Sp
	C07	Bn-scaff_16130_1-p2426412	30052879	-0.65	10.52	A/G	18Semi
	C07	Bn-scaff_17291_1-p22307	33367658	0.47	5.27	T/G	18Semi
	C07	Bn-scaff_16069_1-p419772	36765447	0.58	8.88	T/C	18Semi
	C07	Bn-scaff_16069_1-p1051812	37458060	0.65	10.56	A/G	18Semi
	C07	Bn-scaff_16069_1-p1119721	37534457	0.58	8.88	T/C	18Semi
	C07	Bn-scaff_16069_1-p1789002	38196458	0.56	7.89	T/C	18Semi
	C07	Bn-scaff_16069_1-p3864928	40281080	0.53	5.55	A/G	18Semi
	C07	Bn-scaff_16069_1-p3887367	40295772	0.52	6.67	T/C	18Semi
	C07	Bn-scaff_16069_1-p3951797	40349471	2.68	8.73	A/G	18Win
	C07	Bn-scaff_16069_1-p4896946	41202526	-0.48	5.38	T/G	18Semi
	C07	Bn-scaff_16110_1-p2168404	42696563	-2.03- -0.64	7.19-10.29	T/G	17Semi,18Semi
	C08	Bn-scaff_20796_1-p148168	1283236	-0.55	7.75	T/C	18Semi
	C08	Bn-scaff_15923_1-p46551	8618041	0.72	12.6	T/C	18Semi
	C08	Bn-scaff_17637_1-p206002	12324982	0.55	7.48	T/G	18Semi
	C08	Bn-scaff_16174_1-p1445094	23687956	-1.35- -0.51	5.17-6.74	T/G	17Semi,18Semi
	C08	Bn-scaff_20866_1-p15182	30236645	1.65	7.25	T/C	16Sp
	C08	Bn-scaff_16197_1-p2102319	32071553	0.7	5.2663	A/G	17Win
	C08	Bn-scaff_16197_1-p2101694	32072216	0.68	5.4133	A/C	17Win
	C08	Bn-scaff_16197_1-p2100475	32073454	0.68	5.2226	A/G	17Win
	C08	Bn-scaff_16197_1-p2098188	32075732	0.69	5.4221	T/C	17Win
	C08	Bn-scaff_16197_1-p1808165	32337087	-0.5	5.28	A/G	18Semi
	C08	Bn-scaff_16445_1-p2656698	34246941	-2.48	14.95	A/G	16Sp
	C08	Bn-scaff_16445_1-p2523413	34371202	-0.79	15.11	A/G	18Semi
	C08	Bn-A09-p33568547	34886652	1.17	7.23	T/G	18Sp
	C08	Bn-scaff_16445_1-p766826	36034546	1.24	7.27	A/C	18Sp
	C08	Bn-scaff_16445_1-p766444	36034926	1.05	5.51	A/G	18Sp
	C09	Bn-A09-p14167293	13994728	1.3	8.82	T/G	18Sp
	C09	Bn-scaff_20903_1-p300819	16920322	0.6	6.26	A/G	18Semi
	C09	Bn-scaff_15650_1-p721029	17310189	0.49	6.18	A/G	18Semi
	C09	Bn-A09-p15362032	17951213	1.3	8.82	T/G	18Sp
	C09	Bn-scaff_17339_1-p162980	21240024	-0.5	5.84	A/C	18Semi
	C09	Bn-scaff_16297_1-p392549	23679499	1.08	6.01	T/C	18Sp
	C09	Bn-scaff_20972_1-p160691	32990956	0.61	9.14	T/C	18Semi
	C09	Bn-scaff_20972_1-p163951	32994214	0.48	5.96	T/C	18Semi
	C09	Bn-scaff_15930_1-p204804	33113665	-0.74	13.3	A/G	18Semi
	C09	Bn-scaff_16534_1-p872526	33125410	0.54	7.16	A/G	18Semi
	C09	Bn-scaff_19560_1-p51121	33686084	1.2	8.17	T/G	18Sp
	C09	Bn-scaff_19847_1-p21999	36671762	0.51	6.71	T/G	18Semi
	C09	Bn-scaff_17750_1-p2082478	46406421	0.77	15.18	A/G	18Semi
	C09	Bn-scaff_17750_1-p1801981	46672342	0.63	9.57	T/G	18Semi
	C09	Bn-scaff_28053_1-p60542	48401849	0.44	5.2	T/C	18Semi
	C09	Bn-scaff_28053_1-p151532	48496422	0.55	7.61	A/C	18Semi
C20:1	A01	Bn-A01-p2825565	2327566	-4.29	7.4	T/C	16Semi
	A01	Bn-A01-p3993078	3627721	-2.48	5.42	T/C	18Sp
	A01	Bn-A01-p4167795	3847687	-4.3	15.18	T/G	18Sp
	A01	Bn-A01-p4419443	4049900	-2.89	6.85	A/G	18Sp
	A01	Bn-A01-p8121877	7294360	-3.34	9.22	A/C	18Sp
	A01	Bn-scaff_16130_1-p516049	9724178	-3	7.64	A/G	18Sp
	A01	Bn-A01-p14001039	11571928	-4.07	13.65	A/G	18Sp
	A01	Bn-A01-p14200787	11786990	-2.47	5.33	T/C	18Sp
	A01	Bn-A05-p23466337	16089798	-4.17	14.4	T/C	18Sp
	A01	Bn-A01-p22051021	18668332	-4.07	13.65	A/C	18Sp
	A01	Bn-A01-p22085117	18711173	-4.21	14.54	T/G	18Sp
	A01	Bn-A01-p23943508	20037023	-5.05	5.2	A/G	17Sp
	A01	Bn-A01-p24811222	20548292	-4.68	8.03	A/C	17Sp
	A01	Bn-Scaffold000164-p192232	20662548	2.49	5.38	T/C	18Sp
	A01	Bn-A01-p26369651	20893064	-4.21	14.54	T/C	18Sp
	A02	Bn-A02-p5500107	2619870	-2.92	6.7	G/C	18Sp
	A02	Bn-A02-p5516551	2642351	-2.82	6.01	T/C	18Sp
	A02	Bn-A02-p6182486	3353851	-2.87	6.37	T/G	18Sp
	A02	Bn-A02-p8313782	5280748	-5.71	5.53	A/G	16Sp
	A02	Bn-A02-p9993945	6839808	-3.31	8.7	A/C	18Sp
	A02	Bn-A02-p10524842	7382073	-2.48	6.53	T/G	18Sp
	A02	Bn-A02-p10527075	7384305	-2.48	6.53	A/G	18Sp
	A02	Bn-A02-p10528586	7385820	-2.36	5.37	T/C	18Sp
	A02	Bn-A02-p10530978	7389045	-2.48	6.53	A/G	18Sp
	A02	Bn-A02-p10540148	7396589	-2.48	6.53	T/C	18Sp
	A02	Bn-A02-p10629886	7494728	-2.31	6.02	T/C	18Sp
	A02	Bn-A02-p10681015	7547374	4.47	5.82	T/G	18Sp
	A02	Bn-A02-p11356944	8016133	-2.54	6.09	A/G	18Sp
	A02	Bn-A02-p11492320	8209171	-2.18	5.12	A/G	18Sp
	A02	Bn-A02-p11535570	8242262	-3.17	7.79	T/C	18Sp
	A02	Bn-A02-p11278529	8285468	5.84	5.57	A/G	18Sp
	A02	Bn-A02-p11284285	8292886	-3.02	10.66	T/C	18Sp
	A02	Bn-A02-p11291606	8302442	-2.57	7.01	A/G	18Sp
	A02	Bn-A02-p11646535	8370335	-2.31	6.02	A/G	18Sp
	A02	Bn-A02-p11648522	8372362	-2.31	6.02	A/C	18Sp
	A02	Bn-A02-p11682974	8405495	-2.24	5.3	T/C	18Sp
	A02	Bn-A02-p11683024	8405545	-2.33	5.94	T/G	18Sp
	A02	Bn-A02-p11683481	8406002	-2.22	5.42	T/C	18Sp
	A02	Bn-A02-p11759281	8466680	-2.67	6.1	T/C	18Sp
	A02	Bn-A02-p11789023	8492822	-2.89	7.84	A/G	18Sp
	A02	Bn-A02-p11909870	8619316	-2.64	5.95	T/G	18Sp
	A02	Bn-A02-p11939715	8652572	1.83	6.34	A/C	18Win
	A02	Bn-A02-p11939983	8652839	1.79	5.29	A/G	18Win
	A02	Bn-A02-p12028821	8733654	-2.97	9.3	A/G	18Sp
	A02	Bn-A02-p12284078	9000295	-3.69	10.64	A/C	18Sp
	A02	Bn-A02-p12678353	9443175	2.59	5.79	T/C	18Sp
	A02	Bn-A02-p15569271	11995190	-4.07	13.65	T/C	18Sp
	A02	Bn-A02-p16526928	12747101	-4.07	13.65	A/G	18Sp
	A02	Bn-A02-p16529092	12749267	-4.07	13.65	A/T	18Sp
	A02	Bn-A02-p21061002	18906336	-4.07	13.65	T/A	18Sp
	A02	Bn-A02-p22394632	20766866	-4.73	5.15	T/C	17Sp
	A03	Bn-A03-p6039029	5451346	-8.54	5	A/G	16Semi
	A03	Bn-A03-p6057369	5472473	-8.54	5	T/G	16Semi
	A03	Bn-A03-p14153283	13346806	-4.07	13.65	T/G	18Sp
	A03	Bn-scaff_17521_1-p1338444	14239734	-2.6	5.58	A/G	18Sp
	A03	Bn-A03-p15768536	14841202	-3.33	9.41	A/G	18Sp
	A03	Bn-A03-p16565487	15689355	19.36	13.2	T/G	18Semi
	A03	Bn-A03-p16607714	15721885	12.9	6.22	A/C	18Semi
	A03	Bn-A03-p21076805	19827790	-10.55- -10.52	5.56-6.81	T/G	16Win,17Win
	A03	Bn-A03-p21979477	20795986	-6.17	6.26	A/G	16Win
	A03	Bn-A03-p25582691	23947675	-9.43	6.33	A/G	17Win
	A03	Bn-A08-p12064516	25135299	-9.43	6.33	A/G	17Win
	A03	Bn-A03-p27337536	25579664	-4.17	14.4	A/G	18Sp
	A04	Bn-A04-p14687930	15158346	-3.36	9.4	T/A	18Sp
	A04	Bn-A04-p14944421	15393322	-8.12	5.43	T/C	17Sp
	A05	Bn-A05-p2840734	2901659	-2.8	7.11	A/G	18Sp
	A05	Bn-A05-p5100352	4920148	-3.14	7.95	A/G	18Sp
	A05	Bn-A05-p5279229	5066963	-3.06	7.69	T/C	18Sp
	A05	Bn-A05-p6337412	5900455	-8.8	5.41	T/G	16Win
	A05	Bn-scaff_22002_1-p155273	14235909	-11.06	6.98	A/G	17Sp
	A05	Bn-A05-p20425452	18636249	-4.21	14.54	T/C	18Sp
	A05	Bn-A05-p21000008	19161118	-3.73	5.68	A/G	17Sp
	A06	Bn-A06-p89131	75213	-4.4	5.91	A/G	17Win
	A06	Bn-A06-p853722	1082917	-2.7	6.01	T/C	18Sp
	A06	Bn-A06-p3353405	3171169	-8.54	5	A/G	16Semi
	A06	Bn-A06-p5690066	5138084	3.08	5.17	T/C	17Sp
	A06	Bn-A06-p5758576	5202215	3.14	5.47	A/G	17Sp
	A06	Bn-A06-p6341389	5792362	2.58	5.67	A/G	18Sp
	A06	Bn-A06-p7771695	7398901	2.53	5.25	G/C	18Sp
	A06	Bn-A06-p8042439	7677435	6.21	5.22	T/G	17Sp
	A06	Bn-A06-p21293821	20382472	-2.57	5.69	T/C	18Sp
	A06	Bn-A06-p21280471	20397054	-5.64	5.43	A/G	17Sp
	A06	Bn-A06-p21116438	20562931	3.71	6.04	T/G	17Sp
	A06	Bn-A06-p22056809	21092687	-2.6	5.73	T/C	18Sp
	A06	Bn-A06-p23586019	22556612	2.79	6.61	T/C	18Sp
	A07	Bn-A07-p12811691	14903111	-2.35	5.98	T/C	18Sp
	A07	Bn-A07-p12963622	15076161	-2.98	6.06	T/C	18Sp
	A07	Bn-A07-p13715621	15709981	-4.07	13.65	T/C	18Sp
	A07	Bn-A07-p14121891	16038710	-4.07	13.65	T/G	18Sp
	A07	Bn-A07-p20230189	21986980	-2.61	5.54	A/G	18Sp
	A07	Bn-A07-p22251906	23651078	-8.54	5	T/G	16Semi
	A08	Bn-A08-p211090	254465	-8.54	5	T/C	16Semi
	A08	Bn-A08-p2534474	1970535	-4.21	5.69	T/G	16Semi
	A08	Bn-A08-p2536015	1972074	-4.23	5.31	T/C	16Semi
	A08	Bn-A08-p2590415	2026514	-4.98	7.55	T/G	16Semi
	A08	Bn-A08-p2711497	2151791	-5.22	8.08	A/G	16Semi
	A08	Bn-scaff_16022_1-p861	2175405	-4.96	8.07	T/C	16Semi
	A08	Bn-A08-p2771143	2221399	-4.21	5.12	A/G	16Semi
	A08	Bn-A08-p2898446	2352138	2.33	5.85	A/C	18Win
	A08	Bn-A08-p3068539	2548947	-3.03	7.64	T/C	18Sp
	A08	Bn-A08-p3182594	2666734	2.74	7.27	T/G	18Win
	A08	Bn-Scaffold000283-p1502	3214985	-3.94	5.36	T/G	16Semi
	A08	Bn-Scaffold000259-p29271	3346565	-4.89	5.43	T/C	16Semi
	A08	Bn-A08-p4000353	3400768	-4.89	5.43	A/G	16Semi
	A08	Bn-A08-p4077507	3476858	-5.55	7.61	T/C	16Semi
	A08	Bn-A08-p4207231	3626292	-4.99	5.31	A/G	16Semi
	A08	Bn-A08-p4353407	3758432	-5.61	7	T/G	16Semi
	A08	Bn-A08-p4407886	3815148	-5.17	6.71	T/C	16Semi
	A08	Bn-A08-p4413411	3820740	-5.61	7	A/G	16Semi
	A08	Bn-A08-p5491239	4749486	-4.89	5.43	A/C	16Semi
	A08	Bn-A08-p6164968	5233054	-7.01	4.93	A/G	18Semi
	A08	Bn-A08-p6165340	5233421	2.17	5.11	A/G	18Win
	A08	Bn-A08-p6165665	5233745	2.13	5.45	A/G	18Win
	A08	Bn-A08-p6170057	5238176	2.27	5.78	A/G	18Win
	A08	Bn-A08-p6238237	5293592	1.98	5.25	A/G	18Win
	A08	Bn-A08-p6246411	5307302	2.45	7.87	T/C	18Win
	A08	Bn-A08-p6722442	5662763	-5.37	6.7	A/C	16Semi
	A08	Bn-Scaffold000219-p12098	5924131	2.39	7.63	A/G	18Win
	A08	Bn-A08-p7851497	6825015	-2.71-2.22	4.95-5.58	A/G	16Semi,18Win
	A08	Bn-A08-p8073664	7071236	2.31	6.52	T/C	18Win
	A08	Bn-A08-p8091811	7078853	-4.83	5.8	T/C	16Semi
	A08	Bn-A08-p8396508	7205103	-5	5.34	G/C	16Semi
	A08	Bn-A08-p8372634	7233060	2.34	5.42	A/C	18Win
	A08	Bn-A08-p8480734	7330998	-2.56	5.42	A/C	18Sp
	A08	Bn-A08-p8587056	7466643	-2.68	5.46	A/G	16Semi
	A08	Bn-A08-p8755323	7621328	-5.12	6.76	T/C	16Semi
	A08	Bn-A08-p8909433	7774654	2.26	5.44	T/C	18Win
	A08	Bn-A08-p10026421	8026232	-3.94	7.84	T/G	16Semi
	A08	Bn-A08-p10068904	8070062	-5	6.98	T/C	16Semi
	A08	Bn-A08-p10071208	8077834	2.69	7.19	T/C	18Win
	A08	Bn-A08-p10608550	8600170	5.22	5.2	A/C	16Win
	A08	Bn-A08-p12556455	10335312	-5.23	9.87	T/C	17Sp
	A08	Bn-A08-p12559372	10338217	-5.69- -5.11	7.4-10.1	A/C
	A08	Bn-A08-p12752628	10449877	-4.64	6.4	T/C	17Sp
	A08	Bn-A08-p12781426	10473952	-7.77- -3.41	5.12-9.29	A/G	16Sp,16Semi
	A08	Bn-A08-p12794893	10478870	-2.81	6.03	T/C	16Semi
	A08	Bn-A08-p12797532	10481492	-4.88- -2.56	5.20-6.29	A/C	16Semi,17Sp
	A08	Bn-A08-p12599446	10515601	-4.73- -3.85	5.31-8.91	T/C	16Sp,16Semi,17Sp
	A08	Bn-A08-p12814556	10579998	-4.66- -2.81	5.22-6.76	T/C	16Semi,17Sp
	A08	Bn-A08-p12820786	10587675	-5.18- 4.51	5.07-9.28	A/C	16Sp,16Semi,17Sp,17Semi
	A08	Bn-A08-p12836248	10616096	-3.38	9.57	T/G	18Sp
	A08	Bn-A08-p12940197	10716399	-4.81	5.68	T/C	16Sp
	A08	Bn-A08-p13011710	10787813	-4.91	7.53	A/G	17Sp
	A08	Bn-A08-p13030362	10839190	-4.36- -3.16	7.12-7.46	A/C	16Sp,16Semi
	A08	Bn-A08-p13030439	10839267	-4.05	13.65	T/G	16Semi
	A08	Bn-A08-p13036508	10848584	-4.68- -3.52	6.71-12.01	T/C	16Sp,17Sp,16Semi
	A08	Bn-A08-p13060591	10872038	-4.48- -3.63	5.31-10.74	A/G	16Semi,17Sp
	A08	Bn-A08-p13066424	10878218	-4.79- -3.49	7.12-13.82	T/C	16Semi,17Sp
	A08	Bn-scaff_17821_1-p119310	10883841	-2.51	5.06	A/G	16Semi
	A08	Bn-A08-p13221380	10967902	-5.06	8.07	T/G	16Semi
	A08	Bn-A08-p13239621	10991701	-3.25	6.85	T/C	16Semi
	A08	Bn-A08-p13239816	10991896	-5.63	5.28	T/C	16Sp
	A08	Bn-A08-p13271950	11040796	-5.46	8.69	T/C	17Sp
	A08	Bn-A08-p13289070	11057222	-1.87	5.04	A/G	16Semi
	A08	Bn-A08-p13328135	11075408	-5.6	5.03	T/C	16Sp
	A08	Bn-A08-p13544679	11303575	-3.55	5.1	T/G	16Sp
	A08	Bn-A08-p14493385	12192499	-6.25	6.06	A/G	16Sp
	A08	Bn-A08-p15620471	13151026	-2.43	5.12	T/G	18Sp
	A08	Bn-A08-p15700195	13211796	-6.68	7.06	A/G	16Win
	A08	Bn-A08-p15802943	13299986	3.33	6.74	T/C	17Win
	A08	Bn-A08-p16521179	13985519	-5.35	7.27	A/G	16Sp
	A08	Bn-scaff_24726_1-p33555	14029706	-8.24- -8.13	9.1-10.35	A/G	16Sp，17Sp
	A09	Bn-A09-p3029767	2949844	2.68	8.64	A/G	18Win
	A09	Bn-A09-p3047090	2966602	-3.44	6.7	A/G	18Win
	A09	Bn-A09-p3051349	2971334	2.83	8.89	T/C	18Win
	A09	Bn-A09-p3097420	3031273	2.71	7.54	T/G	18Win
	A09	Bn-A09-p3116738	3051909	2.65	7.58	A/G	18Win
	A09	Bn-A09-p7741917	6875367	-4.07	13.65	T/C	18Sp
	A09	Bn-A09-p15648941	11460219	-4.21	14.54	A/C	18Sp
	A09	Bn-A09-p26874249	24934319	-3.42	9.82	T/C	18Sp
	A09	Bn-A09-p27109839	25110047	-5.82	7.27	T/C	18Win
	A09	Bn-A09-p29617756	27436058	-4.25	15.18	A/G	18Sp
	A09	Bn-A09-p29628819	27447511	-3.17	9.09	A/G	18Sp
	A09	Bn-A09-p29630906	27449598	-2.61	5.71	T/C	18Sp
	A09	Bn-A09-p30058247	27873283	-3.04	7.83	A/G	18Sp
	A09	Bn-A09-p30344978	28127637	-3.83	12.23	A/G	18Sp
	A09	Bn-A09-p30406985	28191525	13.64	7.62	A/G	18Semi
	A09	Bn-scaff_16197_1-p1039692	29638853	-3.34	9.32	A/G	18Sp
	A09	Bn-A09-p5157169	29734047	-4.21	14.54	A/C	18Sp
	A09	Bn-A09-p32104974	29995505	-4.07	13.65	T/A	18Sp
	A09	Bn-A09-p32105188	29995720	-2.66	5.75	G/C	18Sp
	A09	Bn-A09-p32884256	30637433	-3.42	9.82	T/G	18Sp
	A09	Bn-A09-p35425963	32570439	10.62	5.83	A/G	17Sp
	A09	Bn-A09-p35656352	32788000	-7.67	5.92	T/C	17Sp
	A09	Bn-A09-p36112515	33233968	-7	5.36	T/C	17Win
	A10	Bn-scaff_16414_1-p1072066	924566	-3.42	9.82	A/C	18Sp
	A10	Bn-scaff_17367_1-p866103	5436896	-3.69	11.14	C/G	18Sp
	A10	Bn-A10-p5819027	5451194	-3.68	10.96	A/C	18Sp
	A10	Bn-A10-p5845294	5477102	-2.55	6.24	A/G	18Sp
	A10	Bn-A10-p6760904	8368314	-2.91	7.13	T/G	18Sp
	A10	Bn-A10-p9892016	11331024	-5.34	5.66	A/G	16Sp
	A10	Bn-A10-p10402358	11793064	-5.48	5.84	T/C	16Sp
	A10	Bn-A10-p11082862	12444437	-6.31	5.59	T/C	17Sp
	A10	Bn-A10-p13965313	13956813	-4.21	14.54	T/C	18Sp
	A10	Bn-A10-p14431375	14378179	-2.39	5.89	A/G	18Sp
	A10	Bn-A10-p14914898	14852876	-3.23	9.4	T/G	18Sp
	A10	Bn-A10-p15169777	15102698	-2.64	6.82	T/C	18Sp
	A10	Bn-A10-p16187017	15385541	-3.47	10.89	T/C	18Sp
	A10	Bn-A10-p15237864	16249745	-5.32	5.57	T/G	17Sp
	C01	Bn-scaff_19244_1-p408047	351146	-3.18	6.15	A/G	16Sp
	C01	Bn-scaff_15838_5-p884827	3717929	-2.97	7.5	T/C	18Sp
	C01	Bn-scaff_19193_1-p927967	5409405	-2.65	5.62	A/G	18Sp
	C01	Bn-scaff_19193_1-p875889	5468648	-2.97	7.5	T/C	18Sp
	C01	Bn-scaff_17827_1-p963588	7866768	-3.17	9.07	A/G	18Sp
	C01	Bn-scaff_20210_1-p112176	8275151	-11.12	7.31	T/C	17Sp
	C01	Bn-scaff_24947_1-p9186	12580789	-3.34	9.22	A/G	18Sp
	C01	Bn-scaff_17959_1-p284214	19958853	-4.07	13.65	T/G	18Sp
	C01	Bn-scaff_16691_1-p61463	22711808	2.52	5.42	T/C	18Sp
	C01	Bn-scaff_16929_1-p886262	27867888	-3.46	10.03	T/C	18Sp
	C01	Bn-A03-p11765203	32558894	-2.67	5.6	A/T	18Sp
	C01	Bn-A08-p9268915	32559113	-2.69	5.48	T/G	18Sp
	C02	Bn-scaff_27485_1-p7330	18237676	-6.54	5.19	A/G	17Sp
	C02	Bn-scaff_15918_1-p303294	42232633	-3	5.27	T/C	16Semi
	C02	Bn-scaff_16139_1-p1275964	45269337	2.51	5.39	T/C	17Win
	C02	Bn-scaff_16139_1-p1267317	45277206	2.47	5.6	T/G	17Win
	C03	Bn-scaff_16002_1-p1603062	12801259	-3.42	9.82	A/G	18Sp
	C03	Bn-scaff_20646_1-p926102	17133919	-4.21	14.54	C/G	18Sp
	C03	Bn-scaff_17298_1-p1964250	24021079	-7.36	5.16	T/C	16Sp
	C03	Bn-scaff_18917_1-p948837	28788165	2.79	6.12	T/C	18Sp
	C03	Bn-scaff_17636_1-p3673	38484538	-10.55- -10.52	5.56-6.81	T/G	16Win,17Win
	C03	Bn-scaff_27145_1-p1140	38537758	-10.55- -10.52	5.56-6.81	A/G	16Win,17Win
	C03	Bn-scaff_24631_1-p422231	49305992	-5.08- -4.34	6.65-9.52	T/G	16Sp,17Sp
	C03	Bn-scaff_16182_1-p542363	51767633	-4.39	5.47	T/C	16Sp
	C03	Bn-scaff_16182_1-p197353	52081022	-3.87	5.07	T/C	16Sp
	C03	Bn-scaff_17457_1-p493971	53921047	3.44-3.76	5.95-9.15	T/C	16Win,17Win
	C03	Bn-scaff_17457_1-p283145	54255211	3.17-3.29	5.22-5.73	A/G	16Win,17Win
	C03	Bn-scaff_15794_3-p165426	55436898	-3.25	5.31	T/C	16Semi
	C03	Bn-scaff_15794_3-p164881	55438616	-3.74	8.24	A/G	16Semi
	C03	Bn-scaff_15794_3-p164492	55439004	-3.25	5.31	A/G	16Semi
	C03	Bn-scaff_15794_3-p164289	55439215	-3.25	5.31	T/C	16Semi
	C03	Bn-scaff_15794_3-p154754	55441236	-3.74	8.24	T/C	16Semi
	C03	Bn-scaff_15794_3-p154541	55441422	-3.25	5.31	T/G	16Semi
	C03	Bn-scaff_15794_3-p154030	55441933	-3.74	8.24	T/C	16Semi
	C03	Bn-scaff_15794_3-p146954	55448952	-3.5	8.85	A/G	16Semi
	C03	Bn-scaff_15794_3-p34099	55541518	-3.28	6.33	T/C	16Semi
	C03	Bn-scaff_15794_3-p33912	55541704	-3.25	5.31	T/G	16Semi
	C03	Bn-scaff_15794_3-p33848	55541768	-3.25	5.31	A/G	16Semi
	C03	Bn-scaff_15794_3-p33647	55541956	-3.25	5.31	A/G	16Semi
	C03	Bn-scaff_15794_3-p32373	55543405	-3.25	5.31	T/C	16Semi
	C03	Bn-scaff_15794_3-p32092	55543546	-3.64	9.27	T/C	16Semi
	C03	Bn-scaff_15794_3-p29807	55549749	-3.25	5.31	A/C	16Semi
	C03	Bn-scaff_15794_3-p29784	55549752	-3.25	5.31	A/C	16Semi
	C03	Bn-scaff_15794_3-p75109	55706690	-3.74	8.24	A/C	16Semi
	C03	Bn-scaff_15794_3-p75392	55706973	-3.25	5.31	A/G	16Semi
	C03	Bn-scaff_15794_3-p84106	55711458	-3.28	6.33	T/C	16Semi
	C03	Bn-scaff_15794_3-p84885	55712231	-3.25	5.31	T/C	16Semi
	C03	Bn-scaff_15794_3-p89166	55716440	-3.05	5.21	A/C	16Semi
	C03	Bn-scaff_15794_3-p89881	55717233	-3.25	5.31	T/C	16Semi
	C03	Bn-scaff_15794_3-p89999	55717350	-3.88	12.34	T/C	16Semi
	C03	Bn-scaff_15794_3-p108033	55728615	-4.5	7.63	T/G	16Semi
	C03	Bn-scaff_15794_3-p137832	55738317	-3.25	5.31	T/C	16Semi
	C03	Bn-A08-p12905848	56466150	-4.66	6.76	A/C	17Sp
	C03	Bn-scaff_17119_1-p114444	56783871	-7.03	5.26	T/C	16Sp
	C03	Bn-scaff_23761_1-p604385	57766095	2.25	5.06	A/G	18Win
	C03	Bn-scaff_23761_1-p629838	57793005	2.17	5	A/G	18Win
	C03	Bn-scaff_23761_1-p670245	57826088	2.17	5	A/G	18Win
	C03	Bn-scaff_23761_1-p678860	57834399	2.17	5	T/G	18Win
	C03	Bn-scaff_23761_1-p679099	57834638	2.17	5	A/G	18Win
	C04	Bn-scaff_16534_1-p399693	2953815	-4.3	15.18	T/C	18Sp
	C04	Bn-scaff_16534_1-p2589323	5172318	-3.47	10.77	A/C	18Sp
	C04	Bn-scaff_16394_1-p987099	32288653	-2.78	6.43	A/G	18Sp
	C04	Bn-scaff_16394_1-p1000446	32296416	-2.78	6.43	T/G	18Sp
	C04	Bn-scaff_16394_1-p1090896	32408105	-3.91	12.72	A/C	18Sp
	C04	Bn-scaff_16394_1-p1121499	32474946	-3.91	12.72	A/G	18Sp
	C04	Bn-scaff_16394_1-p1129497	32479022	-3.91	12.72	A/G	18Sp
	C04	Bn-scaff_16876_1-p1180053	33757657	-3.69	6.04	A/C	17Sp
	C04	Bn-scaff_16876_1-p1178318	33759393	-3.86	5.37	A/G	17Sp
	C04	Bn-A04-p8178053	34768905	-10.02	5.56	T/C	17Semi
	C04	Bn-scaff_16214_1-p529898	43596049	-3.97	13.14	G/C	18Sp
	C04	Bn-A06-p8545758	43596727	-3.97	13.14	A/T	18Sp
	C04	Bn-scaff_15585_1-p276555	44214027	-4.21	14.54	T/G	18Sp
	C04	Bn-scaff_15585_1-p291968	44230930	-3.38	9.57	T/G	18Sp
	C04	Bn-scaff_15585_1-p368364	44297353	-3.38	9.57	A/C	18Sp
	C04	Bn-scaff_15585_1-p368724	44297772	-3.38	9.57	T/C	18Sp
	C04	Bn-scaff_16888_1-p748106	44903004	-11.12	7.31	A/G	17Sp
	C04	Bn-scaff_16888_1-p1347380	45497825	-4.21	14.54	T/C	18Sp
	C04	Bn-scaff_18903_1-p497762	47649170	-4.07	13.65	T/C	18Sp
	C04	Bn-scaff_18903_1-p497804	47649214	-4.07	13.65	A/C	18Sp
	C05	Bn-scaff_20901_1-p1505546	2515848	-4.21	14.54	T/C	18Sp
	C05	Bn-scaff_15712_10-p505603	5229784	-2.47	5.62	T/G	18Sp
	C05	Bn-scaff_18181_1-p1691104	6103006	-4.21	14.54	T/G	18Sp
	C05	Bn-A06-p8221017	9624871	-4.3	15.18	A/C	18Sp
	C05	Bn-scaff_21338_1-p467919	11924522	-2.67	6.42	A/G	18Sp
	C05	Bn-scaff_23937_1-p36794	14356298	-14.16	10.07	T/C	16Win
	C05	Bn-scaff_23305_1-p46201	21774776	-11.12	7.31	A/G	17Sp
	C05	Bn-scaff_22099_1-p251444	24830406	-4.11	13.97	C/G	18Sp
	C05	Bn-scaff_18589_1-p76811	29685677	-8.54- -3.42	5.00-9.82	T/C	16Semi,18Sp
	C05	Bn-scaff_19224_1-p29858	29769187	-8.54	5	A/G	16Semi
	C05	Bn-A05-p17894045	33067590	3.01	6.47	T/C	18Sp
	C05	Bn-A07-p541617	36934827	-4.21	14.54	T/G	18Sp
	C05	Bn-scaff_17441_1-p731079	39839348	5.53	5.11	T/C	16Win
	C05	Bn-scaff_20270_1-p1048306	41530991	-8.3	5.57	T/C	17Sp
	C06	Bn-scaff_18549_1-p600676	926911	-3.62	10.93	C/G	18Sp
	C06	Bn-scaff_20773_1-p123341	5669209	-6.6	5.69	T/C	17Sp
	C06	Bn-scaff_20773_1-p121051	5671443	-6.6	5.69	T/C	17Sp
	C06	Bn-scaff_17984_1-p738580	9547979	-14.16	10.07	C/G	16Win
	C06	Bn-scaff_16116_1-p198599	28112773	-8.54	5	T/C	16Semi
	C06	Bn-scaff_20294_1-p421721	33540207	-4.21	14.54	A/G	18Sp
	C07	Bn-scaff_22310_1-p321188	7983992	-2.88	6.06	T/C	18Sp
	C07	Bn-scaff_22301_1-p41757	8940554	-14.16	10.07	A/G	16Win
	C07	Bn-scaff_15754_1-p802584	27237297	-3.21	9.28	A/G	18Sp
	C07	Bn-scaff_15754_1-p827585	27281539	-3.21	9.28	G/C	18Sp
	C07	Bn-scaff_15705_1-p1673044	34945104	2.06	5.42	A/C	18Win
	C07	Bn-scaff_15705_1-p1709973	34982215	1.9	5.09	T/G	18Win
	C07	Bn-scaff_15705_1-p1710163	34982405	1.9	5.09	A/G	18Win
	C07	Bn-scaff_15705_1-p1717463	34993958	1.9	5.09	T/G	18Win
	C07	Bn-scaff_15705_1-p1719177	34995636	2	5.6	A/G	18Win
	C07	Bn-scaff_15705_1-p1719589	34996087	1.9	5.09	A/G	18Win
	C07	Bn-scaff_15705_1-p1719850	34996348	1.9	5.09	T/C	18Win
	C07	Bn-scaff_16069_1-p431757	36777489	-2.67	6.14	A/G	18Sp
	C07	Bn-scaff_16069_1-p3154456	39581904	-4.33	5.14	T/C	16Semi
	C07	Bn-scaff_16110_1-p2557297	42337856	-2.89	6.99	A/G	18Sp
	C07	Bn-scaff_16110_1-p2554704	42340445	-2.89	6.99	A/G	18Sp
	C08	Bn-A08-p6162660	14268534	4.51	5.85	A/G	18Win
	C08	Bn-scaff_16770_1-p2909313	25418777	-6.78	7.74	A/G	17Sp
	C08	Bn-scaff_16770_1-p2818885	25496632	-6.37	5.44	A/G	17Sp
	C08	Bn-scaff_16361_1-p3265282	30742757	-2.66	6.11	A/C	18Sp
	C08	Bn-scaff_16197_1-p222284	33797284	-14.16	10.07	T/A	16Win
	C08	Bn-scaff_21269_1-p121333	36981334	-4.17	14.4	A/C	18Sp
	C08	Bn-scaff_16389_1-p426263	37677917	-11.12	7.31	A/C	17Sp
	C09	Bn-scaff_17526_1-p1726345	909377	-2.69	5.94	T/C	18Sp
	C09	Bn-scaff_19783_1-p925928	3381696	-14.02	12.4	T/A	17Sp
	C09	Bn-scaff_19783_1-p949675	3416466	-14.02	12.4	A/G	17Sp
	C09	Bn-scaff_17190_1-p1134270	4485060	-14.02	12.4	A/C	17Sp
	C09	Bn-scaff_17423_1-p376558	5187172	-14.02	12.4	A/G	17Sp
	C09	Bn-scaff_17084_1-p760542	5898067	-14.02	12.4	A/C	17Sp
	C09	Bn-scaff_23207_1-p385083	6278444	-14.02	12.4	C/G	17Sp
	C09	Bn-scaff_17683_1-p313031	8500380	-4.07	13.65	T/A	18Sp
	C09	Bn-scaff_28725_1-p174565	10433330	-8.54	5	A/G	16Semi
	C09	Bn-scaff_17174_1-p62030	13393631	-4.21	14.54	T/C	18Sp
	C09	Bn-scaff_15930_1-p105169	33300046	-14.16	10.07	G/C	16Win
	C09	Bn-scaff_16456_1-p453404	35037965	-4.3	15.18	T/C	18Sp
	C09	Bn-scaff_16456_1-p406379	35075252	-4.3	15.18	T/G	18Sp
C22:1	A01	Bn-A01-p2825565	2327566	-13.19	7.1	T/C	16Semi
	A01	Bn-A01-p3599097	3266316	26.7	5.45	T/C	16Win
	A01	Bn-A01-p3782356	3432061	-12.58	5.2	A/G	18Sp
	A01	Bn-A01-p4167795	3847687	-19.55	8.45	T/G	18Sp
	A01	Bn-A01-p5678678	5185882	-15.86	5.58	T/G	16Sp
	A01	Bn-A01-p14001039	11571928	-16.97	6.25	A/G	18Sp
	A01	Bn-A05-p23466337	16089798	-19.15	8.9	T/C	18Sp
	A01	Bn-A01-p21519780	18133211	28.91	6.44	A/G	16Win
	A01	Bn-A01-p21902788	18510574	22.76	5.09	A/G	16Win
	A01	Bn-A01-p22051021	18668332	-16.97	6.25	A/C	18Sp
	A01	Bn-A01-p22085117	18711173	-20.62	8.95	T/G	18Sp
	A01	Bn-A01-p26369651	20893064	-20.62	8.95	T/C	18Sp
	A02	Bn-A02-p1290847	87693	25.32	6.27	T/G	16Win
	A02	Bn-scaff_16565_1-p1062007	6923746	-13.9	5.12	T/C	18Sp
	A02	Bn-A02-p10681015	7547374	15.59	6.36	T/G	18Sp
	A02	Bn-A02-p11939715	8652572	5.48	5.32	A/C	18Win
	A02	Bn-A02-p15569271	11995190	-16.97	6.25	T/C	18Sp
	A02	Bn-A02-p16526928	12747101	-16.97	6.25	A/G	18Sp
	A02	Bn-A02-p16529092	12749267	-16.97	6.25	A/T	18Sp
	A02	Bn-A02-p21061002	18906336	-16.97	6.25	T/A	18Sp
	A02	Bn-A02-p22875408	20457744	-11.8	5.31	T/C	17Sp
	A02	Bn-A02-p22872607	20460571	-11.8	5.31	T/G	17Sp
	A02	Bn-A02-p22395060	20766438	-13.53	5.72	A/G	17Sp
	A02	Bn-A02-p22394284	20767214	-13.53	5.72	A/G	17Sp
	A02	Bn-A02-p22386317	20775741	19.47	7.59	A/C	18Sp
	A02	Bn-A02-p23856500	22090285	-11.29	5.57	A/G	17Sp
	A03	Bn-A03-p1922712	1540693	4.91	5.48	A/G	17Win
	A03	Bn-A03-p1923025	1541003	4.72	5.54	T/C	17Win
	A03	Bn-A03-p1951453	1577627	6.13	5.27	A/C	18Win
	A03	Bn-A03-p14153283	13346806	-16.97	6.25	T/G	18Sp
	A03	Bn-A03-p20180463	19041722	24.28	5.48	T/C	16Win
	A03	Bn-A03-p20369417	19241578	-31.98	6.46	A/G	17Semi
	A03	Bn-A03-p20417630	19283838	-31.98	6.46	A/G	17Semi
	A03	Bn-A03-p21294836	20061149	24.94	5.12	T/C	16Win
	A03	Bn-A03-p21783015	20565293	26.97	5.64	A/G	16Win
	A03	Bn-A03-p26309336	24699271	-14.98	6.41	A/G	18Sp
	A03	Bn-A03-p27337536	25579664	-19.15	8.9	A/G	18Sp
	A04	Bn-A04-p14687930	15158346	-15.3	7.07	T/A	18Sp
	A05	Bn-A05-p2840734	2901659	-12.67	5.7	A/G	18Sp
	A05	Bn-Scaffold000172-p116121	10446178	26.97	5.64	A/G	16Win
	A05	Bn-Scaffold000172-p132583	10457206	26.7	5.45	A/C	16Win
	A05	Bn-Scaffold000172-p135389	10463144	26.97	5.64	T/C	16Win
	A05	Bn-A05-p17708970	15861727	-9.14	5.97	A/G	17Sp
	A05	Bn-A05-p20425452	18636249	-20.62	8.95	T/C	18Sp
	A06	Bn-A06-p21501350	20200573	18.72	5.07	T/C	16Sp
	A06	Bn-A06-p22056809	21092687	-13.33	5.11	T/C	18Sp
	A07	Bn-A07-p9512042	10867491	-14.74	6.11	A/G	18Sp
	A07	Bn-A07-p13715621	15709981	-16.97	6.25	T/C	18Sp
	A07	Bn-A07-p14121891	16038710	-16.97	6.25	T/G	18Sp
	A08	Bn-A08-p2415846	1865602	13.22	5.3	A/C	16Win
	A08	Bn-A08-p2590415	2026514	-13.82	5.42	T/G	16Semi
	A08	Bn-A08-p2711497	2151791	-15.26	6.57	A/G	16Semi
	A08	Bn-scaff_16022_1-p861	2175405	-13.85	5.9	T/C	16Semi
	A08	Bn-A08-p3182594	2666734	7.8	5.11	T/G	18Win
	A08	Bn-A08-p3518817	2901967	-14.97	5.08	A/G	16Semi
	A08	Bn-A08-p3529278	2909456	-8.26	5.46	T/G	16Semi
	A08	Bn-A08-p4077507	3476858	-16.43	6.56	T/C	16Semi
	A08	Bn-A08-p4175442	3593029	13.34	5.9	T/G	16Win
	A08	Bn-A08-p4207231	3626292	-17.18	6.27	A/G	16Semi
	A08	Bn-A08-p4347992	3753014	-10.06	5.68	T/G	16Semi
	A08	Bn-A08-p4353407	3758432	-16.49	5.92	T/G	16Semi
	A08	Bn-A08-p4400287	3807624	14.47	5.21	A/G	16Win
	A08	Bn-A08-p4407886	3815148	-17.17- -14.65	5.30,6.05	T/C	16Semi,17Semi
	A08	Bn-A08-p4413411	3820740	-16.49	5.92	A/G	16Semi
	A08	Bn-A08-p6164225	5232300	10.03-10.28	5.60-6.18	T/C	17Semi,18Semi
	A08	Bn-A08-p6170057	5238176	7.51	5.78	A/G	18Win
	A08	Bn-A08-p6246411	5307302	7.37	6.38	T/C	18Win
	A08	Bn-A08-p6268593	5328102	-15.91	5.29	A/T	18Semi
	A08	Bn-A08-p6278699	5331113	-7.82	5.59	T/C	18Sp
	A08	Bn-A08-p6282126	5334539	-15.91	5.29	A/G	18Semi
	A08	Bn-A08-p6299307	5351170	-15.91- -11.94	5.29-5.72	T/C	18Sp,18Semi
	A08	Bn-Scaffold000219-p12098	5924131	7.24	6.36	A/G	18Win
	A08	Bn-A08-p7243965	6283772	26.19	5.28	A/G	16Win
	A08	Bn-A08-p7420713	6441009	15.31	6.45	A/G	16Win
	A08	Bn-A08-p7814432	6786988	-18.01- -16.85	5.61-6.61	A/C
	A08	Bn-A08-p7851497	6825015	-8.2	5.01	A/G	16Semi
	A08	Bn-scaff_16142_1-p976965	7002975	10.32	5.04	A/G	17Semi
	A08	Bn-A08-p8073664	7071236	6.16-6.57	4.97-5.80	T/C	17Win,18Win
	A08	Bn-A08-p8162230	7144812	15.31	6.45	A/G	16Win
	A08	Bn-A08-p8396508	7205103	-17.29	6.36	G/C	16Semi
	A08	Bn-A08-p8385137	7221119	13.84	6.16	T/G	16Win
	A08	Bn-A08-p8432548	7271106	16.19	6.37	A/C	16Win
	A08	Bn-A08-p8480734	7330998	-13.13	6.3	A/C	18Sp
	A08	Bn-A08-p8587056	7466643	-9.62-11.10	6.29-7.00	A/G	16Semi,17Semi,18Semi
	A08	Bn-A08-p8634610	7505807	-10.43	5.09	T/C	18Win
	A08	Bn-A08-p8658074	7529548	8.22	7.45	T/C	17Win
	A08	Bn-A08-p10026421	8026232	-10.64	5.36	T/G	16Semi
	A08	Bn-A08-p10068904	8070062	-26.19- -13.15	5.45-6.22	T/C	16Win,16Semi,17Win,18Semi
	A08	Bn-A08-p10071208	8077834	7.12-9.07	5.80-7.57	T/C	17Win,18Win
	A08	Bn-A08-p10215623	8163002	10.51-10.73	5.95-6.28	A/C
	A08	Bn-A08-p10222411	8166360	9.46	5.45	A/C	17Semi
	A08	Bn-A08-p10473245	8478418	9	5.14	A/C	17Semi
	A08	Bn-A08-p10774582	8683445	9.82-10.02	5.41-6.05	A/G	17Semi,18Semi
	A08	Bn-A08-p10809139	8710652	12.61	6.41	T/C	17Win
	A08	Bn-A08-p11452221	9295268	9.32	5.46	A/C	17Semi
	A08	Bn-A08-p11667191	9509349	9.66-10.34	5.30-5.71	T/G	17Semi,18Semi
	A08	Bn-A08-p12556455	10335312	-10.69-16.46	5.33-7.32	T/C	16Win,17Sp,17Win,18Win
	A08	Bn-A08-p12781426	10473952	-14.87- -14.25	5.51-5.64	A/G	17Semi,18Semi
	A08	Bn-A08-p12794893	10478870	-8.44-11.84	5.49-7.61	T/C	16Semi,17Semi,18Semi
	A08	Bn-A08-p12797532	10481492	10.34-14.09	5.86-6.33	A/C	16Win,17Semi,18Semi
	A08	Bn-A08-p12599446	10515601	-13.08-15.74	5.34-10.44	T/C	16Win,16Semi,17Sp,17Semi,18Semi
	A08	Bn-A08-p12814556	10579998	10.71-14.67	5.28-6.68	T/C	16Win,17Semi,18Semi
	A08	Bn-A08-p12820786	10587675	-14.09-15.15	7.48-11.18	A/C	16Semi,17Sp,17Semi,18Semi
	A08	Bn-A08-p12940197	10716399	-11.29	5.41	T/C	17Sp
	A08	Bn-A08-p13030362	10839190	-8.45-9.86	5.25-5.83	A/C	16Semi,17Semi
	A08	Bn-A08-p13030439	10839267	-11.83-9.92	5.08-10.92	T/G	16Semi,17Semi,18Semi
	A08	Bn-A08-p13036508	10848584	-9.39-9.63	5.57-7.80	T/C	16Semi,17Semi,18Semi
	A08	Bn-A08-p13060591	10872038	-11.32	10.46	A/G	16Semi
	A08	Bn-A08-p13066424	10878218	-10.53	12.38	T/C	16Semi
	A08	Bn-scaff_17821_1-p119310	10883841	-8.6	5.86	A/G	16Semi
	A08	Bn-A08-p13221380	10967902	-14.59	6.69	T/G	16Semi
	A08	Bn-A08-p13239621	10991701	-10.05	6.69	T/C	16Semi
	A08	Bn-A08-p13376746	11121237	15.01	5.72	A/G	16Win
	A08	Bn-A08-p15802943	13299986	7.82	5.06	T/C	18Win
	A08	Bn-A08-p15945454	13407211	-13.24	5.56	T/G	16Sp
	A09	Bn-A09-p3029767	2949844	9.08	9.43	A/G	18Win
	A09	Bn-A09-p3047090	2966602	-11.79-9.17	6.10-7.40	A/G	17Win,18Win
	A09	Bn-A09-p3051349	2971334	9.51-10.41	5.46-9.42	T/C	18Win,18Semi
	A09	Bn-A09-p3097420	3031273	6.80-8.84	4.99-7.27	T/G	17Win,18Win
	A09	Bn-A09-p3116738	3051909	8.84	7.86	A/G	18Win
	A09	Bn-A09-p4286317	3776219	-13.22	5.2	T/C	17Sp
	A09	Bn-A09-p4475636	4388001	-10.14	5.51	A/G	17Sp
	A09	Bn-A09-p7741917	6875367	-16.97	6.25	T/C	18Sp
	A09	Bn-A09-p15648941	11460219	-20.62	8.95	A/C	18Sp
	A09	Bn-A09-p26874249	24934319	-14.68	5.23	T/C	18Sp
	A09	Bn-A09-p27109839	25110047	-14.44	5.45	T/C	17Win
	A09	Bn-A09-p29628819	27447511	-12.71	5.33	A/G	18Sp
	A09	Bn-scaff_16361_1-p2978691	27568994	-21.31	11.34	A/C	18Sp
	A09	Bn-A09-p30344978	28127637	-16.83	7.5	A/G	18Sp
	A09	Bn-A09-p4990811	29570840	-14.33	5.14	A/C	17Sp
	A09	Bn-A09-p5157169	29734047	-20.62	8.95	A/C	18Sp
	A09	Bn-A09-p32104974	29995505	-16.97	6.25	T/A	18Sp
	A09	Bn-A09-p32884256	30637433	-14.68	5.23	T/G	18Sp
	A10	Bn-scaff_16414_1-p1072066	924566	-14.68	5.23	A/C	18Sp
	A10	Bn-scaff_17367_1-p866103	5436896	-15.1	7.78	C/G	18Sp
	A10	Bn-A10-p5819027	5451194	-16.03	10.32	A/C	18Sp
	A10	Bn-A10-p5831782	5464372	-8.63	5.6	A/C	18Sp
	A10	Bn-A10-p5832645	5465234	-9.44	7.26	T/C	18Sp
	A10	Bn-A10-p5845294	5477102	-10.53	6.17	A/G	18Sp
	A10	Bn-A10-p3649288	6741192	13.51	5.03	A/C	16Sp
	A10	Bn-A10-p13965313	13956813	-20.62	8.95	T/C	18Sp
	A10	Bn-A10-p14914898	14852876	-12.87	5.54	T/G	18Sp
	A10	Bn-A10-p15117055	15060421	-22.23	15.05	A/G	18Sp
	A10	Bn-A10-p15169777	15102698	-10.37	6.07	T/C	18Sp
	A10	Bn-A10-p16213045	15365401	-22.23	15.05	A/G	18Sp
	A10	Bn-A10-p16187017	15385541	-14.59	7.5	T/C	18Sp
	A10	Bn-A10-p15658567	15908867	-20.76	11.23	T/C	18Sp
	C01	Bn-scaff_15838_5-p884827	3717929	-15.8	6.17	T/C	18Sp
	C01	Bn-scaff_19193_1-p875889	5468648	-15.8	6.17	T/C	18Sp
	C01	Bn-scaff_17827_1-p963588	7866768	-14.1	7.34	A/G	18Sp
	C01	Bn-scaff_17369_1-p829445	11551256	15.47	5.19	T/C	16Sp
	C01	Bn-scaff_17959_1-p284214	19958853	-16.97	6.25	T/G	18Sp
	C01	Bn-A03-p11765203	32558894	-12.52	5.87	A/T	18Sp
	C01	Bn-A08-p9268915	32559113	-12.48	5.93	T/G	18Sp
	C01	Bn-scaff_21015_1-p34786	32559311	-18.26	12.34	A/G	18Sp
	C02	Bn-scaff_16565_1-p1065413	12539608	-20.76	11.23	T/A	18Sp
	C02	Bn-scaff_17177_1-p365264	44856141	9.75-9.80	5.13-5.60	A/G	17Semi,18Semi
	C02	Bn-scaff_16139_1-p1282857	45262444	6.2	4.96	T/G	18Win
	C02	Bn-scaff_16139_1-p1051077	45458213	6.7	5.84	T/G	18Win
	C03	Bn-scaff_16002_1-p1603062	12801259	-14.68	5.23	A/G	18Sp
	C03	Bn-scaff_20646_1-p926102	17133919	-20.62	8.95	C/G	18Sp
	C03	Bn-scaff_18356_1-p41271	34832695	14.41	6.99	T/C	16Sp
	C03	Bn-scaff_18356_1-p39463	34834475	13.79	5.71	G/C	16Sp
	C03	Bn-scaff_19310_1-p563494	35365572	26.72	5.82	T/C	16Win
	C03	Bn-scaff_24631_1-p415987	49299855	-13.63- -10.47	5.23-5.34	T/C	16Sp,17Sp
	C03	Bn-scaff_24631_1-p422231	49305992	-11.31	6.29	T/G	17Sp
	C03	Bn-scaffold19029-p392	50495327	14.38	5.34	T/C	16Win
	C03	Bn-scaff_17042_1-p477626	53580147	6.5	5.69	A/C	17Win
	C03	Bn-scaff_17042_1-p478613	53581434	6.62	6.28	T/C	17Win
	C03	Bn-scaff_17042_1-p517224	53639638	6.57	5.59	A/C	17Win
	C03	Bn-scaff_17042_1-p696305	53858549	7.78	5.13	A/C	18Win
	C03	Bn-scaff_17042_1-p711807	53879150	7.78	5.13	A/C	18Win
	C03	Bn-scaff_17457_1-p505494	53910264	7.78	5.13	A/G	18Win
	C03	Bn-scaff_17457_1-p493971	53921047	6.81-8.42	6.20-6.70	T/C	17Win,18Win
	C03	Bn-scaff_17457_1-p283145	54255211	6.52	5.22	A/G	17Win
	C03	Bn-scaff_17457_1-p282932	54255426	6.55-8.82	5.24-6.53	T/C	17Win,18Win
	C03	Bn-scaff_15794_3-p165426	55436898	-10.35	5.26	T/C	16Semi
	C03	Bn-scaff_15794_3-p164881	55438616	-12.65	9.73	A/G	16Semi
	C03	Bn-scaff_15794_3-p164492	55439004	-10.35	5.26	A/G	16Semi
	C03	Bn-scaff_15794_3-p164289	55439215	-10.35	5.26	T/C	16Semi
	C03	Bn-scaff_15794_3-p154754	55441236	-12.65	9.73	T/C	16Semi
	C03	Bn-scaff_15794_3-p154541	55441422	-10.35	5.26	T/G	16Semi
	C03	Bn-scaff_15794_3-p154030	55441933	-12.65	9.73	T/C	16Semi
	C03	Bn-scaff_15794_3-p146954	55448952	-11.26	9.16	A/G	16Semi
	C03	Bn-scaff_15794_3-p34099	55541518	-10.18	5.96	T/C	16Semi
	C03	Bn-scaff_15794_3-p33912	55541704	-10.35	5.26	T/G	16Semi
	C03	Bn-scaff_15794_3-p33848	55541768	-10.35	5.26	A/G	16Semi
	C03	Bn-scaff_15794_3-p33647	55541956	-10.35	5.26	A/G	16Semi
	C03	Bn-scaff_15794_3-p32373	55543405	-10.35	5.26	T/C	16Semi
	C03	Bn-scaff_15794_3-p32092	55543546	-11.94	10.2	T/C	16Semi
	C03	Bn-scaff_15794_3-p29807	55549749	-10.35	5.26	A/C	16Semi
	C03	Bn-scaff_15794_3-p29784	55549752	-10.35	5.26	A/C	16Semi
	C03	Bn-scaff_15794_3-p75109	55706690	-12.65	9.73	A/C	16Semi
	C03	Bn-scaff_15794_3-p75392	55706973	-10.35	5.26	A/G	16Semi
	C03	Bn-scaff_15794_3-p84106	55711458	-10.18	5.96	T/C	16Semi
	C03	Bn-scaff_15794_3-p84885	55712231	-10.35	5.26	T/C	16Semi
	C03	Bn-scaff_15794_3-p89166	55716440	-9.98	5.72	A/C	16Semi
	C03	Bn-scaff_15794_3-p89881	55717233	-10.35	5.26	T/C	16Semi
	C03	Bn-scaff_15794_3-p89999	55717350	-12.47	13.05	T/C	16Semi
	C03	Bn-scaff_15794_3-p108033	55728615	-14.82	8.45	T/G	16Semi
	C03	Bn-scaff_15794_3-p137832	55738317	-10.35	5.26	T/C	16Semi
	C04	Bn-scaff_16534_1-p399693	2953815	-19.55	8.45	T/C	18Sp
	C04	Bn-A04-p8178053	34768905	-22.8	5.05	T/C	17Semi
	C04	Bn-scaff_16214_1-p529898	43596049	-18.35	9.23	G/C	18Sp
	C04	Bn-A06-p8545758	43596727	-18.35	9.23	A/T	18Sp
	C04	Bn-scaff_15585_1-p276555	44214027	-20.62	8.95	T/G	18Sp
	C04	Bn-scaff_16888_1-p1347380	45497825	-20.62	8.95	T/C	18Sp
	C04	Bn-scaff_18903_1-p497762	47649170	-16.97	6.25	T/C	18Sp
	C04	Bn-scaff_18903_1-p497804	47649214	-16.97	6.25	A/C	18Sp
	C05	Bn-scaff_20901_1-p1505546	2515848	-20.62	8.95	T/C	18Sp
	C05	Bn-scaff_18181_1-p1691104	6103006	-20.62	8.95	T/G	18Sp
	C05	Bn-scaff_18181_1-p195543	7443620	14.67	5.2	A/G	16Sp
	C05	Bn-A06-p8221017	9624871	-19.55	8.45	A/C	18Sp
	C05	Bn-scaff_22099_1-p251444	24830406	-17.86	7.75	C/G	18Sp
	C05	Bn-scaff_18589_1-p76811	29685677	-14.68	5.23	T/C	18Sp
	C05	Bn-A07-p541617	36934827	-20.62	8.95	T/G	18Sp
	C06	Bn-scaff_20294_1-p421721	33540207	-20.62	8.95	A/G	18Sp
	C07	Bn-scaff_18501_1-p435344	20749142	13.62	5.74	A/G	16Win
	C07	Bn-scaff_15705_1-p1673044	34945104	5.91	6.05	A/C	17Win
	C07	Bn-scaff_15705_1-p1719177	34995636	6.41	5.36	A/G	18Win
	C07	Bn-scaff_15705_1-p2274493	35279701	6.48	6.39	A/G	17Win
	C07	Bn-scaff_15705_1-p2279820	35285036	6.67	6.66	T/C	17Win
	C07	Bn-scaff_15705_3-p234783	36007480	7.18	5.47	T/G	17Win
	C07	Bn-scaff_16110_1-p3665779	41272431	18.32	5.23	A/G	16Win
	C07	Bn-scaff_16110_1-p3663736	41274347	18.32	5.23	T/C	16Win
	C07	Bn-scaff_16110_1-p3663531	41274506	18.32	5.23	T/C	16Win
	C07	Bn-scaff_16110_1-p3663477	41274560	18.32	5.23	T/C	16Win
	C07	Bn-scaff_16110_1-p3662599	41276076	18.32	5.23	A/G	16Win
	C07	Bn-scaff_16110_1-p3662181	41276494	18.32	5.23	A/C	16Win
	C07	Bn-scaff_16110_1-p3656167	41281588	18.32	5.23	A/G	16Win
	C07	Bn-scaff_16110_1-p3632527	41291743	18.32	5.23	T/C	16Win
	C07	Bn-scaff_16110_1-p3625372	41293869	18.32	5.23	A/C	16Win
	C07	Bn-scaff_16110_1-p3624627	41294682	18.32	5.23	A/G	16Win
	C07	Bn-scaff_16110_1-p3586046	41327975	19.49	5.93	T/C	16Win
	C07	Bn-scaff_16110_1-p2412201	42489656	15.29	5.88	A/G	16Win
	C08	Bn-A08-p6162660	14268534	15.03	5.89	A/G	18Win
	C08	Bn-scaff_15699_1-p577914	16728899	-11.52	4.95	A/G	17Win
	C08	Bn-scaff_16770_1-p2909313	25418777	-14.4	5.78	A/G	17Sp
	C08	Bn-scaff_16361_1-p2793822	30283886	-18.07	8.57	A/G	18Sp
	C08	Bn-scaff_16197_1-p2968446	31306568	18.87	6.65	A/C	17Sp
	C08	Bn-scaff_16445_1-p2613244	34299866	-9.88	5.31	T/C	17Sp
	C08	Bn-scaff_21269_1-p121333	36981334	-19.15	8.9	A/C	18Sp
	C09	Bn-scaff_19783_1-p327775	2815375	-12.18	6.25	T/C	17Sp
	C09	Bn-scaff_17683_1-p313031	8500380	-16.97	6.25	T/A	18Sp
	C09	Bn-scaff_17174_1-p62030	13393631	-20.62	8.95	T/C	18Sp
	C09	Bn-scaff_16456_1-p453404	35037965	-19.55	8.45	T/C	18Sp
	C09	Bn-scaff_16456_1-p415818	35068732	-17.1	8.75	T/C	18Sp
	C09	Bn-scaff_16456_1-p406379	35075252	-19.55	8.45	T/G	18Sp
	C09	Bn-scaff_17109_2-p188015	46096485	-22.23	15.05	A/G	18Sp
